# Supplementary material for: Coffee consumption and health: umbrella review of meta-analyses of multiple health outcomes
Source: PubMed Central journal article supplement — BMJ. 2017 Nov 21;359:j5024. doi: 10.1136/bmj.j5024 (PMC5696634; doi:10.1136/bmj.j5024), 2017-11-21

## APPENDIX 2: Coffee consumption and outcome groups [posted as supplied by author]

### Mortality

Figure A: Coffee consumption and mortality outcomes

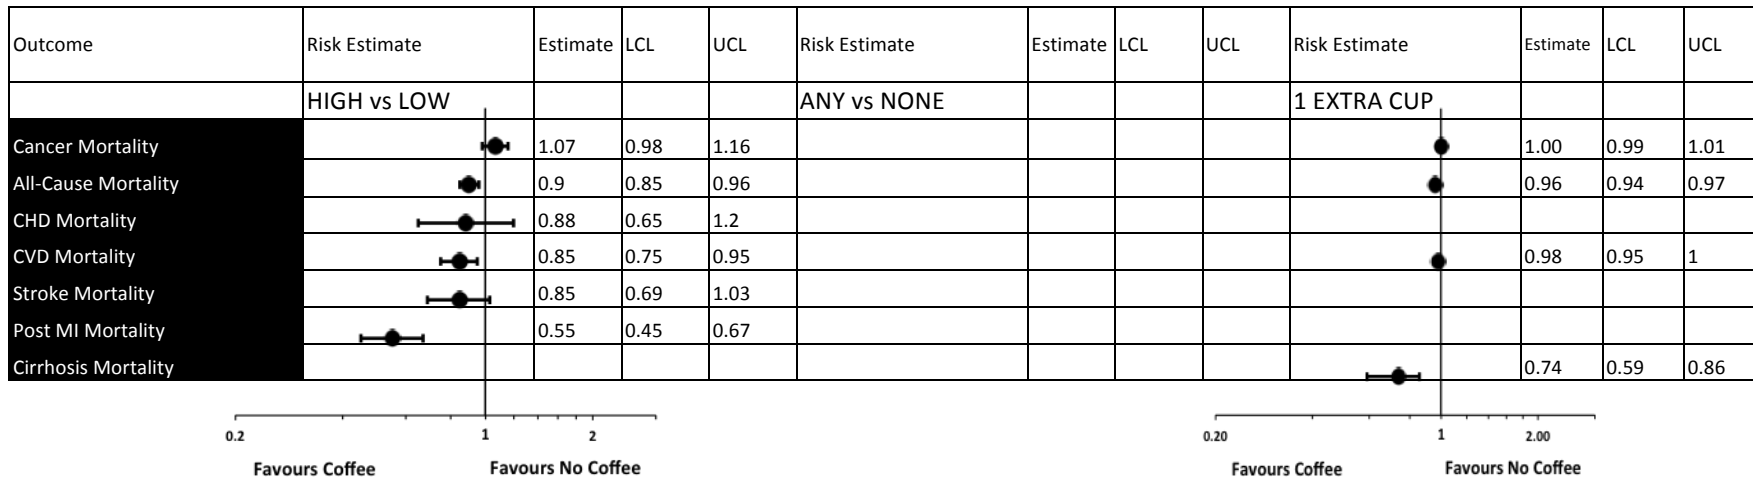

## Cardiovascular

Figure B: Coffee consumption and cardiovascular outcomes

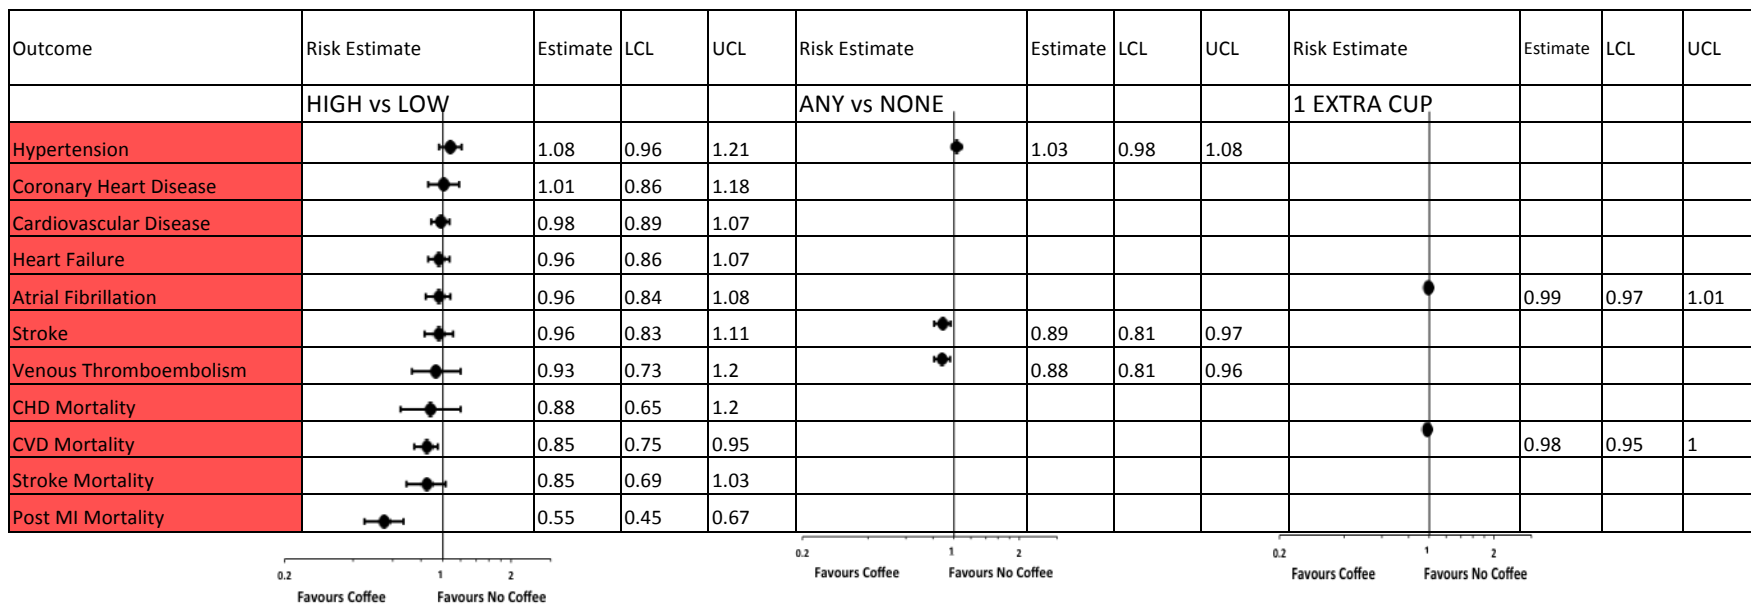

# Cancer

Figure C: Coffee consumption and cancer outcomes

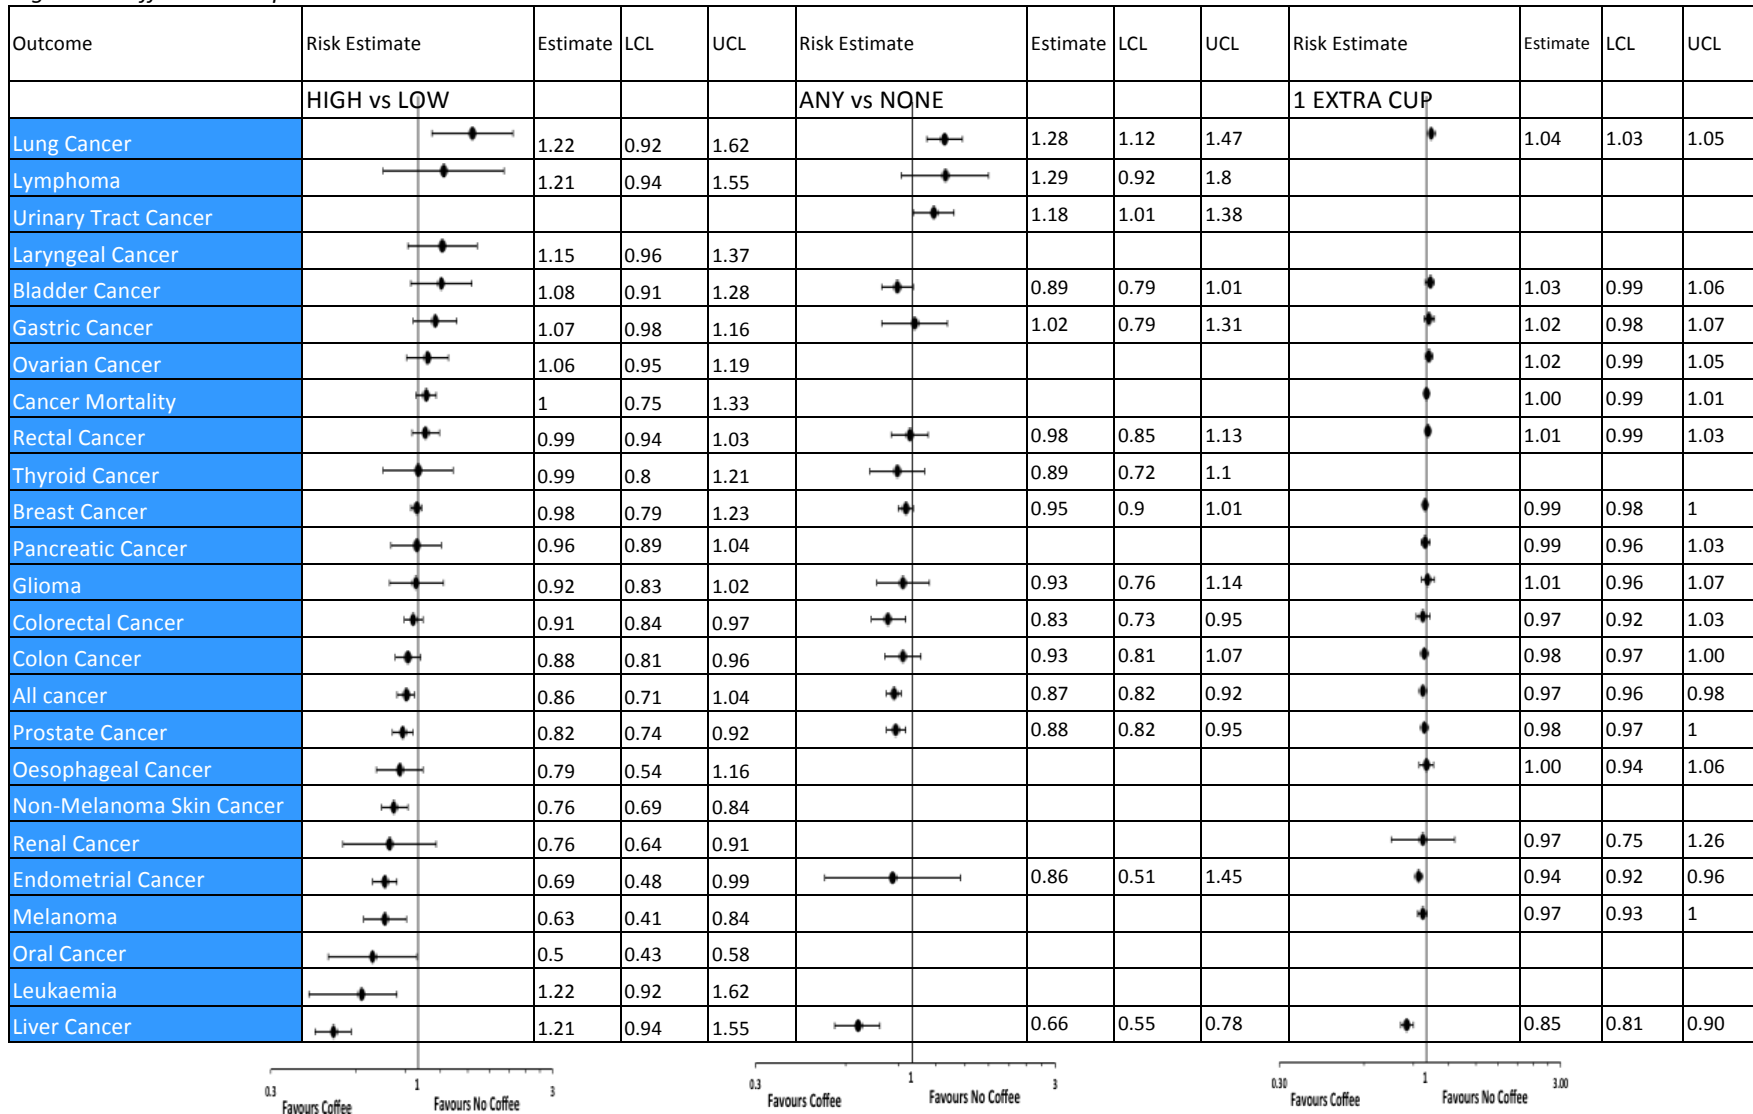

## Liver and gastrointestinal

Figure D: Coffee consumption and liver and gastrointestinal outcomes

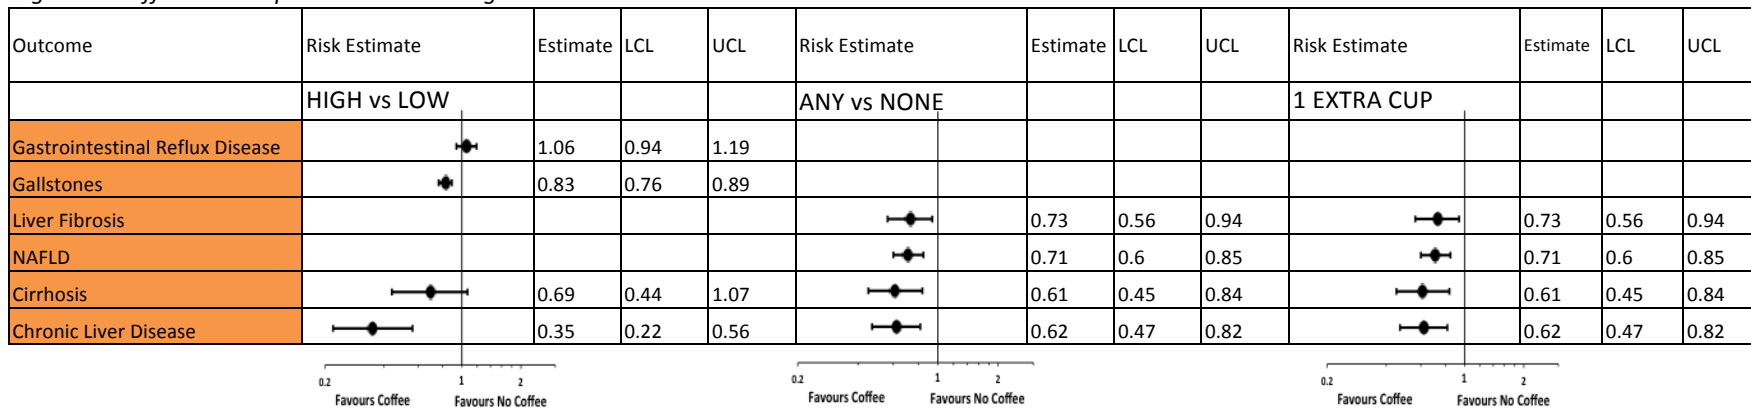

## Pregnancy-related

Figure E: Coffee consumption and pregnancy-related outcomes

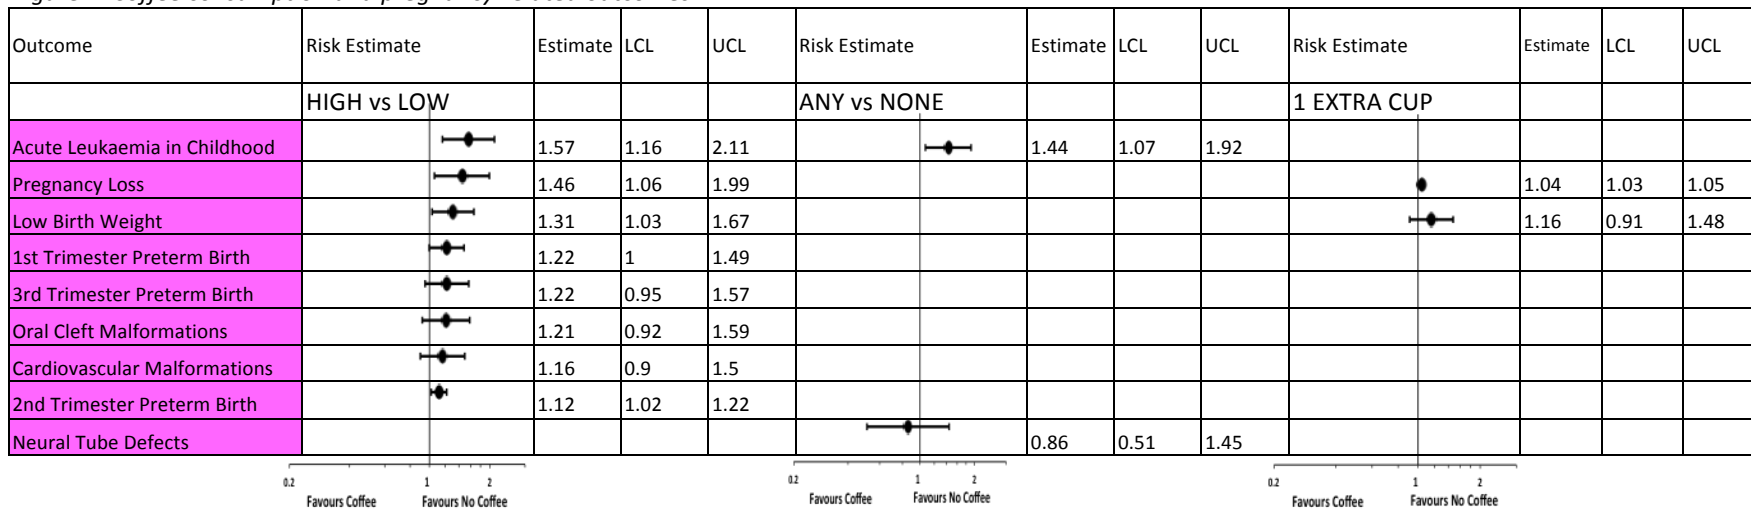

## Metabolic

Figure F: Coffee consumption and metabolic outcomes

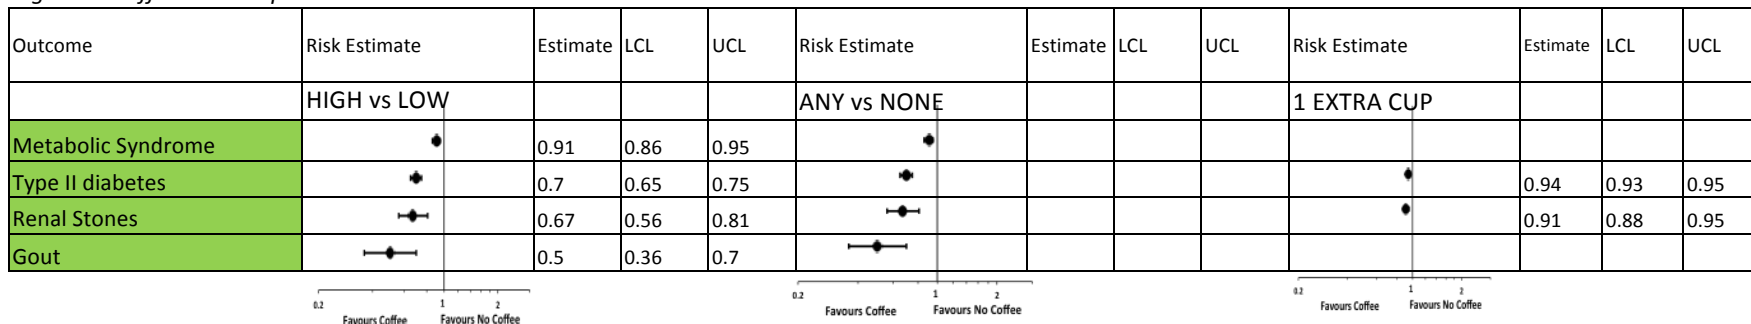

## Renal

Figure G: Coffee consumption and renal outcomes

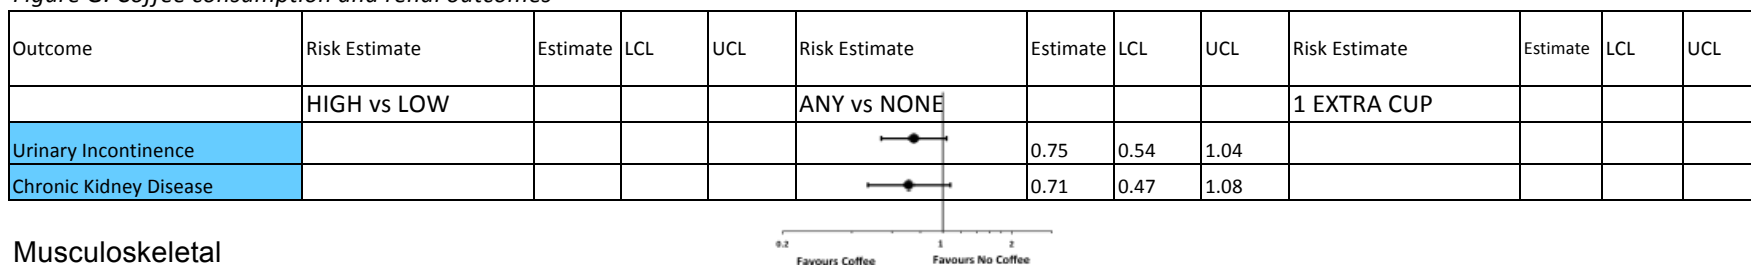

## Musculoskeletal

Figure H: Coffee consumption and musculoskeletal outcomes

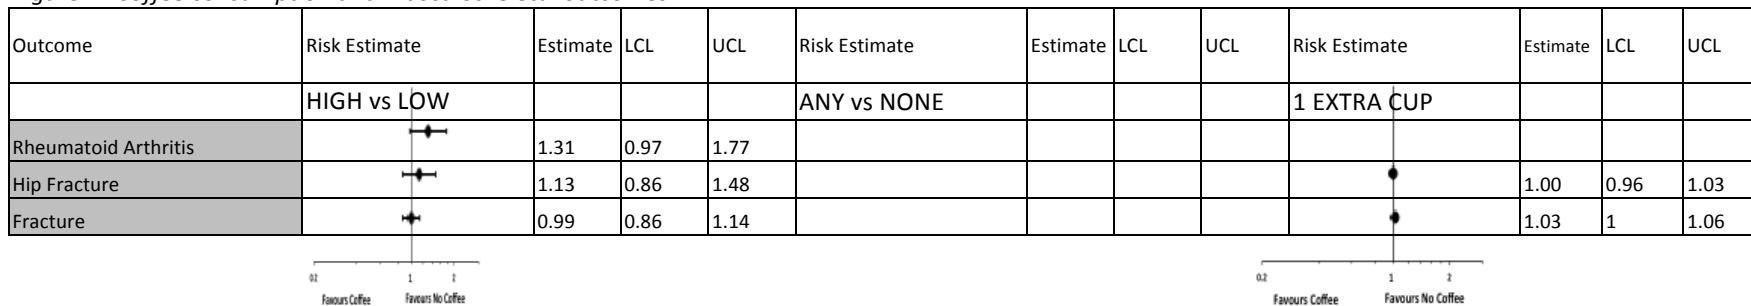

## Gynaecological

Figure 1: Coffee consumption and gynaecological outcomes

| Outcome       | Risk Estimate | Estimate | LCL | UCL | Risk Estimate                                                                      | Estimate | LCL  | UCL  | Risk Estimate | Estimate | LCL | UCL |
|---------------|---------------|----------|-----|-----|------------------------------------------------------------------------------------|----------|------|------|---------------|----------|-----|-----|
|               | HIGH vs LOW   |          |     |     | ANY vs NONE                                                                        |          |      |      | 1 EXTRA CUP   |          |     |     |
| Endometriosis |               |          |     |     | 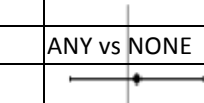 | 1.13     | 0.46 | 2.76 |               |          |     |     |

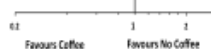

Supplement: poor039281.ww2.pdf [file poor039281.ww2.pdf]
