# Supplementary material for: Coffee consumption and health: umbrella review of meta-analyses of multiple health outcomes
Source: PubMed Central journal article supplement — BMJ. 2017 Nov 21;359:j5024. doi: 10.1136/bmj.j5024 (PMC5696634; doi:10.1136/bmj.j5024), 2017-11-21
Supplement: poor039281.ww1.pdf [file poor039281.ww1.pdf]

| Outcome                             | Author | Year | No. of events /total | Follow up range (years) | Summary measure | Risk Estimate | Estimate | LCL  | UCL  | Total studies | Cohort | Case Control | Effects model | Tau <sup>2</sup> | I <sup>2</sup> | Eggers | AMSTAR |
|-------------------------------------|--------|------|----------------------|-------------------------|-----------------|---------------|----------|------|------|---------------|--------|--------------|---------------|------------------|----------------|--------|--------|
| Endometrial Cancer <sup>29*</sup>   | Zhou   | 2015 | 10100/1534039        | 9-26                    | RR              |               | 0.76     | 0.69 | 0.84 | 13            | 13     | 0            | R             | 0.01             | 28.54          | 0.03   | 7      |
| Melanoma <sup>30*</sup>             | Yew    | 2016 | 3327/925484          | NP                      | RR              |               | 0.76     | 0.64 | 0.91 | 9             | 9      | 0            | R             | 0.03             | 48.34          | 0.77   | 8      |
| Alzheimer's Disease <sup>21*</sup>  | Liu    | 2016 | NP/NP                | 5-21                    | RR              |               | 0.73     | 0.55 | 0.97 | 4             | 4      | 0            | R             | 0.00             | 0.00           | ND     | 6      |
| Type II diabetes <sup>31b*</sup>    | Ding   | 2014 | 45335/1109272        | 1-24                    | RR              |               | 0.70     | 0.65 | 0.75 | 27            | 27     | 0            | R             | 0.01             | 50.28          | 0.05   | 7      |
| Oral Cancer <sup>7*</sup>           | Wang   | 2016 | 1910/1395309         | 6-26                    | RR              |               | 0.69     | 0.48 | 0.99 | 6             | 6      | 0            | R             | 0.12             | 73.67          | ND     | 5      |
| Cirrhosis <sup>32*</sup>            | Liu    | 2015 | 1785/130305          | NP                      | OR              |               | 0.69     | 0.44 | 1.07 | 3             | 3      | 0            | R             | 0.02             | 12.91          | ND     | 7      |
| Renal Stones <sup>33*</sup>         | Wang   | 2014 | NP/126382            | NP                      | RR              |               | 0.67     | 0.56 | 0.81 | 2             | 2      | 0            | R             | 0.00             | 0.00           | ND     | 6      |
| Parkinson's Disease <sup>34b*</sup> | Qi     | 2014 | 2414/894568          | NP                      | RR              |               | 0.64     | 0.53 | 0.76 | 7             | 7      | 0            | R             | 0.01             | 15.88          | ND     | 5      |
| Leukaemia <sup>27</sup>             | Yu     | 2011 | NP <sup>d</sup>      | 8-11                    | RR              |               | 0.63     | 0.41 | 0.84 | 2             | 2      | 0            | R             | NP               | 0              | NP     | 5      |
| Post MI Mortality <sup>35*</sup>    | Brown  | 2016 | 604/3271             | 3.8                     | RR              |               | 0.55     | 0.45 | 0.67 | 2             | 2      | 0            | R             | 0.00             | 8.91           | ND     | 4      |
| Gout <sup>36*</sup>                 | Park   | 2016 | NP/135302            | NP                      | RR              |               | 0.50     | 0.36 | 0.70 | 2             | 2      | 0            | R             | 0.02             | 34.90          | ND     | 6      |
| Liver Cancer <sup>37*</sup>         | Bravi  | 2016 | 3414/2267143         | 10-44                   | RR              |               | 0.50     | 0.43 | 0.58 | 11            | 11     | 0            | R             | 0.01             | 20.00          | 0.62   | 6      |
| Chronic Liver Dis. <sup>37*</sup>   | Bravi  | 2016 | 1410/386049          | 6-19                    | RR              |               | 0.35     | 0.22 | 0.56 | 5             | 5      | 0            | R             | 0.20             | 75.32          | ND     | 6      |

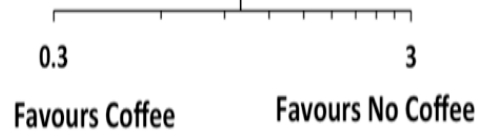

\*Estimates are from our own re-analysis

<sup>a</sup> Maximum consumption in a non-linear dose-response analysis

<sup>b</sup> p-value for non-linearity significant

<sup>c</sup> Not all no. of cases published;

<sup>d</sup> Not possible to separate from other outcomes

NP = Not published; ND = Not done N/A = Not appropriate

Mortality Cardiovascular Cancer Metabolic Liver & GI Renal Pregnancy Musculoskeletal Neurological Gynaecological



| Outcome                            | Author  | Year | No. of events /total | Follow up range (years) | Summary measure | Risk Estimate | Estimate | LCL  | UCL  | Total studies  | Cohort | Case Control | Effects model | Tau <sup>2</sup> | i <sup>2</sup> | Eggers | AMSTAR |
|------------------------------------|---------|------|----------------------|-------------------------|-----------------|---------------|----------|------|------|----------------|--------|--------------|---------------|------------------|----------------|--------|--------|
| CKD <sup>54*</sup>                 | Wijarnp | 2016 | NP/14898             | n/a                     | RR              |               | 0.71     | 0.47 | 1.08 | 4 <sup>e</sup> | 0      | 0            | R             | 0.11             | 65.98          | ND     | 7      |
| NAFLD <sup>55*</sup>               | WijarNP | 2017 | NP/2407              | NP                      | RR              |               | 0.71     | 0.6  | 0.85 | 3 <sup>e</sup> | 1      | 1            | R             | 0.00             | 0.00           | ND     | 7      |
| Liver Cancer <sup>37*</sup>        | Bravi   | 2016 | 3414/2267143         | 10-44                   | RR              |               | 0.66     | 0.55 | 0.78 | 12             | 12     | 0            | R             | 0.06             | 79.84          | 0.24   | 6      |
| Parkinson's Disease <sup>56*</sup> | Noyce   | 2012 | 1940/719187          | 10-27                   | RR              |               | 0.64     | 0.53 | 0.77 | 6              | 6      | 0            | R             | 0.02             | 29.00          | ND     | 7      |
| Chronic Liver Dis. <sup>37*</sup>  | Bravi   | 2016 | 1463/437355          | 6-19                    | RR              |               | 0.62     | 0.47 | 0.82 | 6              | 6      | 0            | R             | 0.07             | 80.25          | ND     | 6      |
| Liver Cirrhosis <sup>32*</sup>     | Liu     | 2015 | 1880/130496          | NP                      | OR              |               | 0.61     | 0.45 | 0.84 | 3              | 3      | 0            | R             | 0.00             | 0.00           | ND     | 7      |

\*Estimates are from our own re-analysis

<sup>d</sup> Not possible to separate from other outcomes

<sup>e</sup> Included cross-sectional studies

NP = Not published

ND = Not done

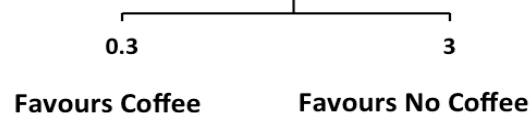

Mortality Cardiovascular Cancer Metabolic Liver & GI Renal Pregnancy Musculoskeletal Neurological Gynaecological

Figure C: Coffee consumption of ONE EXTRA CUP/DAY and associations with multiple health outcomes

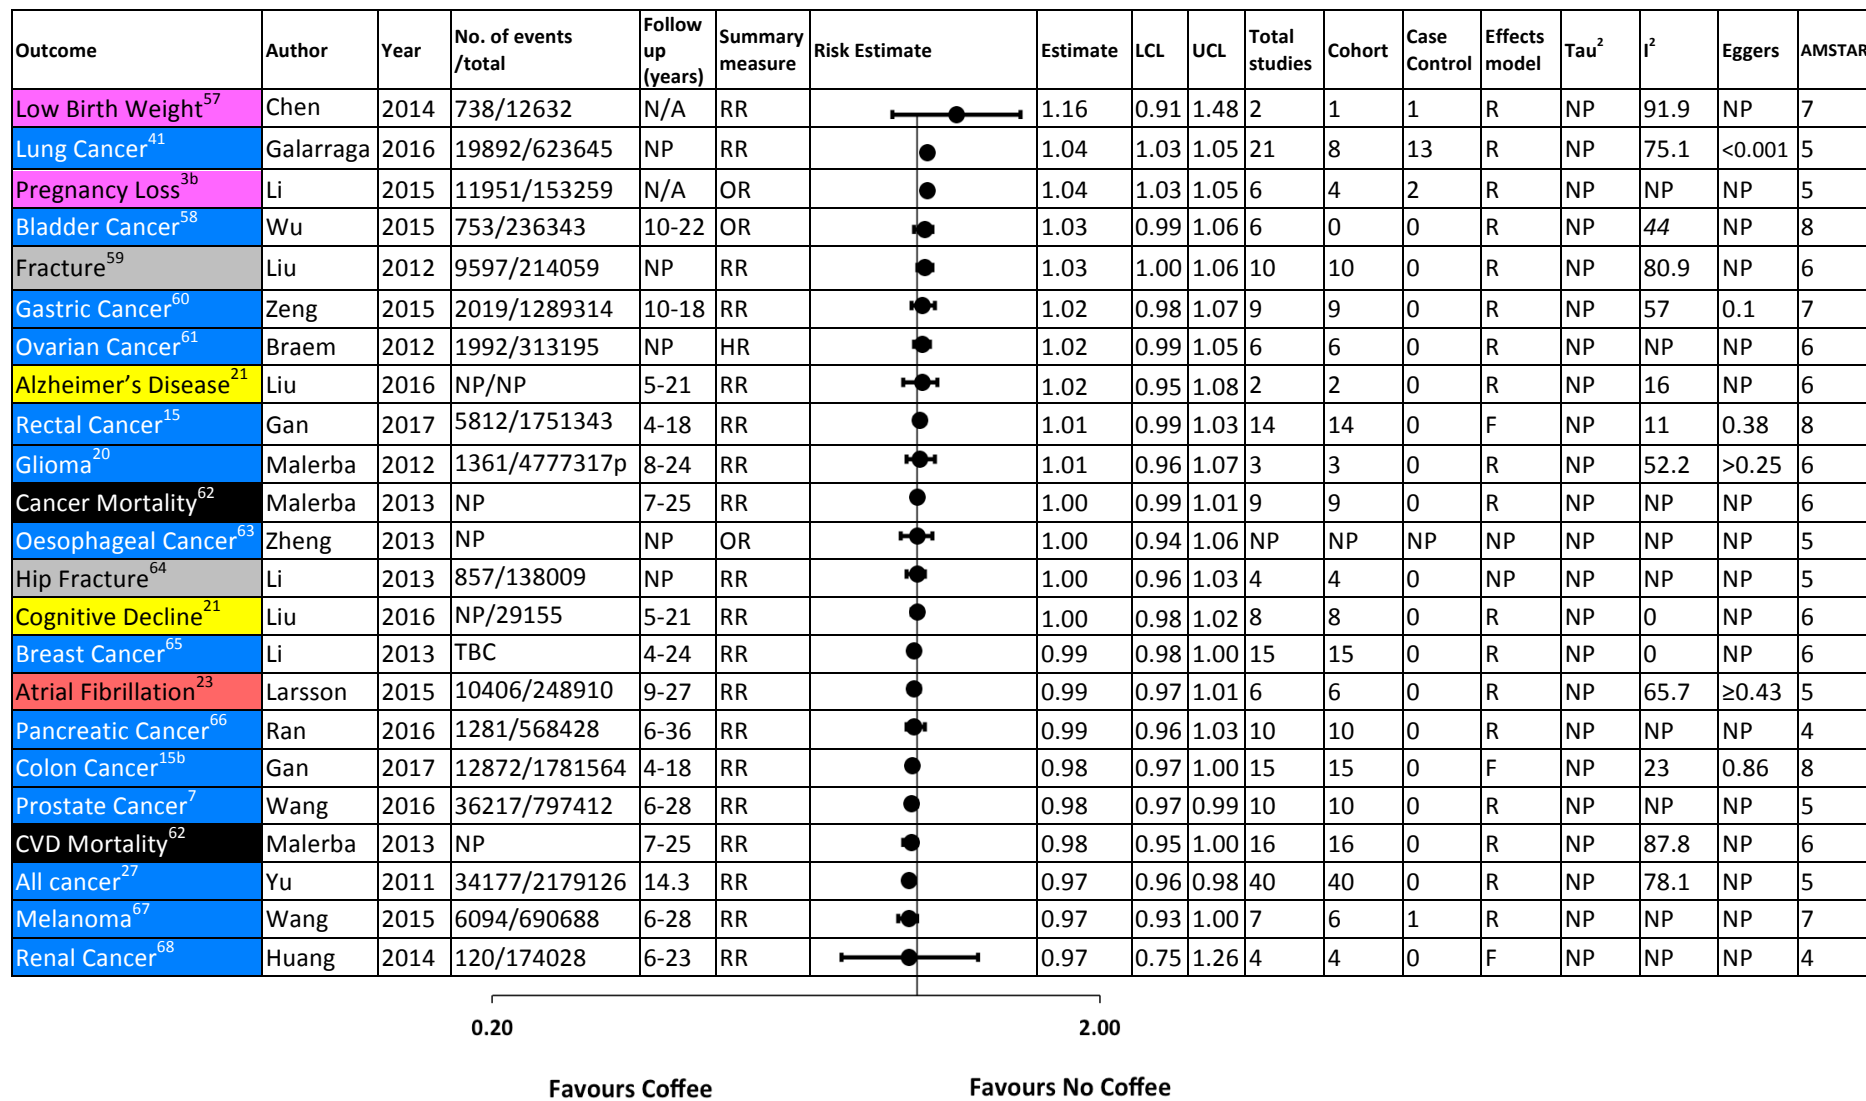

| Outcome                            | Author  | Year | No. of events /total | Follow up (years) | Summary measure | Risk Estimate | Estimate | LCL  | UCL  | Total studies  | Cohort | Case Control | Effects model | Tau <sup>2</sup> | I <sup>2</sup> | Eggers | AMSTAR |
|------------------------------------|---------|------|----------------------|-------------------|-----------------|---------------|----------|------|------|----------------|--------|--------------|---------------|------------------|----------------|--------|--------|
| Colorectal Cancer <sup>15b</sup>   | Gan     | 2017 | 22034/1872460        | 4-18              | RR              |               | 0.97     | 0.92 | 1.03 | 17             | 17     | 0            | R             | NP               | 34.3           | 0.43   | 8      |
| All-Cause Mortality <sup>69b</sup> | Je      | 2014 | 124011/947047        | 7-25              | RR              |               | 0.96     | 0.94 | 0.97 | 16             | 16     | 0            | R             | NP               | NP             | NP     | 6      |
| Gallstones <sup>26b</sup>          | Zhang   | 2015 | 10911/198831         | NP                | RR              |               | 0.95     | 0.91 | 1.00 | 3              | 3      | 0            | R             | NP               | 54.5           | NP     | 8      |
| Type II diabetes <sup>70</sup>     | Jiang   | 2014 | 46722/974372         | 2-20              | RR              |               | 0.94     | 0.93 | 0.95 | 20             | 20     | 0            | R             | NP               | NP             | NP     | 8      |
| Endometrial Cancer <sup>7</sup>    | Wang    | 2016 | 4730/592672          | 6-26              | RR              |               | 0.94     | 0.92 | 0.96 | 11             | 11     | 0            | NP            | NP               | NP             | NP     | 5      |
| Depression <sup>71</sup>           | Wang    | 2016 | 14506/327608         | NP                | RR              |               | 0.92     | 0.87 | 0.97 | 5 <sup>e</sup> | 2      | 1            | R             | NP               | 60.4           | 0.03   | 6      |
| Renal Stones <sup>33</sup>         | Wang    | 2014 | NP/167650            | NP                | RR              |               | 0.91     | 0.88 | 0.95 | 5              | 3      | 2            | R             | NP               | 42.7           | 0.18   | 6      |
| Parkinson's Disease <sup>72</sup>  | Hernan  | 2002 | 459/187281           | NP                | RR              |               | 0.88     | 0.77 | 1.00 | 4              | 4      | 0            | R             | NP               | NP             | NP     | 4      |
| Liver Cancer <sup>37</sup>         | Bravi   | 2016 | 3414/2267143         | 10-44             | RR              |               | 0.85     | 0.81 | 0.90 | 12             | 12     | 0            | R             | NP               | NP             | 0.17   | 6      |
| Cirrhosis <sup>73</sup>            | Kennedy | 2016 | 1364/427687          | 14-18             | RR              |               | 0.83     | 0.78 | 0.88 | 5              | 5      | 0            | R             | NP               | 91.1           | NP     | 9      |
| Cirrhosis Mortality <sup>73</sup>  | Kennedy | 2016 | 1034/303622          | 14-18             | RR              |               | 0.74     | 0.59 | 0.86 | 4              | 4      | 0            | R             | NP               | 90.3           | NP     | 9      |
| Chronic Liver Dis. <sup>37</sup>   | Bravi   | 2016 | 1463/437355          | 10-44             | RR              |               | 0.74     | 0.65 | 0.83 | 6              | 6      | 0            | R             | NP               | NP             | 0.43   | 6      |

Nb: No dose response analyses were re-analysed

<sup>b</sup> p-value for non-linearity significant

<sup>c</sup> Not all no. of cases published;

<sup>d</sup> Not possible to separate from other outcomes

<sup>e</sup> Included cross-sectional studies

NP = Not published

ND = Not done; N/A = Not appropriate

0.20

2.00

Favours Coffee

Favours No Coffee

Mortality Cardiovascular Cancer Metabolic Liver & GI Renal Pregnancy Musculoskeletal Neurological Gynaecological

Figure D: Decaffeinated coffee exposure and associations with multiple health outcomes

| Outcome                             | Author  | Year | No. of events /total | Follow up (years) | Summary measure | Risk Estimate | Estimate | LCL  | UCL  | Total studies | Cohort | Case Control | Effects model | Tau <sup>2</sup> | i <sup>2</sup> | Eggers | AMSTAR |
|-------------------------------------|---------|------|----------------------|-------------------|-----------------|---------------|----------|------|------|---------------|--------|--------------|---------------|------------------|----------------|--------|--------|
| <b>ANY versus NONE</b>              |         |      |                      |                   |                 |               |          |      |      |               |        |              |               |                  |                |        |        |
| Urinary Tract Cancer <sup>42</sup>  | Zeegers | 2001 | NP                   | N/A               | OR              |               | 1.18     | 0.99 | 1.4  | 4             | 0      | 4            | R             | NP               | 2.4            | 0.51   | 5      |
| <b>HIGH versus LOW</b>              |         |      |                      |                   |                 |               |          |      |      |               |        |              |               |                  |                |        |        |
| RheumatoidArthritis <sup>4,5*</sup> | Lee     | 2014 | 638/113822           | 11-20             | RR              |               | 1.71     | 0.79 | 3.71 | 2             | 2      | 0            | R             | NP               | 71.2           | NP     | 5      |
| Bladder Cancer <sup>58</sup>        | Wu      | 2015 | NP                   | 10-22             | OR              |               | 1.29     | 0.88 | 1.89 | 5             | NP     | NP           | R             | NP               | 62.7           | NP     | 8      |
| Coronary Heart Dis. <sup>74</sup>   | Sofi    | 2007 | 5838/155805          | 14-20             | RR              |               | 1.1      | 0.9  | 1.34 | 3             | 3      | 0            | R             | NP               | NP             | NP     | 4      |
| NM Skin Cancer <sup>28*</sup>       | Caini   | 2017 | 25413/NP             | NP                | RR              |               | 1.01     | 0.94 | 1.1  | 3             | 3      | 0            | R             | 0                | 0              | ND     | 5      |
| Cardiovascular Dis. <sup>16</sup>   | Ding    | 2014 | NP                   | NP                | RR              |               | 1.00     | 0.88 | 1.14 | 5             | 5      | 0            | R             | NP               | NP             | NP     | 7      |
| Cancer Mortality <sup>13a</sup>     | Grosso  | 2016 | NP                   | NP                | RR              |               | 1.00     | 0.91 | 1.09 | 2             | 2      | 0            | R             | NP               | NP             | NP     | 5      |
| Breast Cancer <sup>75</sup>         | Jiang   | 2013 | 32790/404188         | 10-22             | RR              |               | 0.97     | 0.89 | 1.06 | 12            | 4      | 8            | F             | NP               | 29.7           | NP     | 5      |
| Parkinson's Disease <sup>34</sup>   | Qi      | 2015 | 1210/251300          | NP                | RR              |               | 0.94     | 0.78 | 1.12 | 4             | 3      | 1            | NP            | NP               | NP             | NP     | 6      |
| MalignantMelanoma <sup>76</sup>     | Liu     | 2016 | NP                   | NP                | RR              |               | 0.94     | 0.82 | 1.08 | 5             | 5      | 0            | R             | NP               | 0              | 0.116  | 7      |
| All-cause Mortality <sup>13a</sup>  | Grosso  | 2016 | NP                   | NP                | RR              |               | 0.90     | 0.79 | 1.01 | 5             | 5      | 0            | R             | NP               | NP             | NP     | 5      |
| CVD Mortality <sup>13a</sup>        | Grosso  | 2016 | NP                   | NP                | RR              |               | 0.86     | 0.69 | 1.08 | 3             | 3      | 0            | R             | NP               | NP             | NP     | 5      |
| Type II Diabetes <sup>31*b</sup>    | Ding    | 2014 | 22015/417454         | 1-24              | RR              |               | 0.80     | 0.70 | 0.91 | 11            | 11     | 0            | R             | 0.03             | 62             | 0.13   | 7      |
| Endometrial Cancer <sup>29</sup>    | Zhou    | 2015 | 3127/363254          | 9-26              | RR              |               | 0.77     | 0.63 | 0.94 | 4             | 4      | 0            | R             | NP               | 0              | 0.88   | 7      |
| Lung Cancer <sup>77</sup>           | Tang    | 2010 | NP                   | NP                | RR              |               | 0.66     | 0.54 | 0.81 | 2             | NP     | NP           | R             | NP               | 0              | NP     | 5      |
| <b>EXTRA 1 CUP/DAY</b>              |         |      |                      |                   |                 |               |          |      |      |               |        |              |               |                  |                |        |        |
| Endometrial Cancer <sup>29</sup>    | Zhou    | 2015 | 3127/363254          | 9-26              | RR              |               | 0.96     | 0.92 | 0.99 | 9             | 9      | 0            | R             | NP               | NP             | NP     | 7      |
| Type II Diabetes <sup>31</sup>      | Ding    | 2014 | 22015/417454         | 1-24              | RR              |               | 0.94     | 0.91 | 0.98 | 14            | 16     | 0            | R             | NP               | NP             | NP     | 7      |
| Liver Cancer <sup>78</sup>          | Kenned  | 2017 | 800/750000           | 11-18             | RR              |               | 0.93     | 0.86 | 1.00 | 3             | 0      | 0            | R             | NP               | NP             | NP     | 8      |

\*Estimates from our own reanalysis

<sup>a</sup> Maximum consumption in a non-linear dose-response analysis

<sup>b</sup> p-value for non-linearity significant

NP = Not published; ND = Not done; N/A = Not appropriate

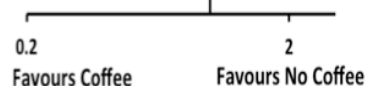

Mortality    Cardiovascular    Cancer    Metabolic    Liver & GI    Renal    Pregnancy    Musculoskeletal    Neurological    Gynaecological



Figure E: Coffee consumption in randomised controlled trials and multiple health outcomes

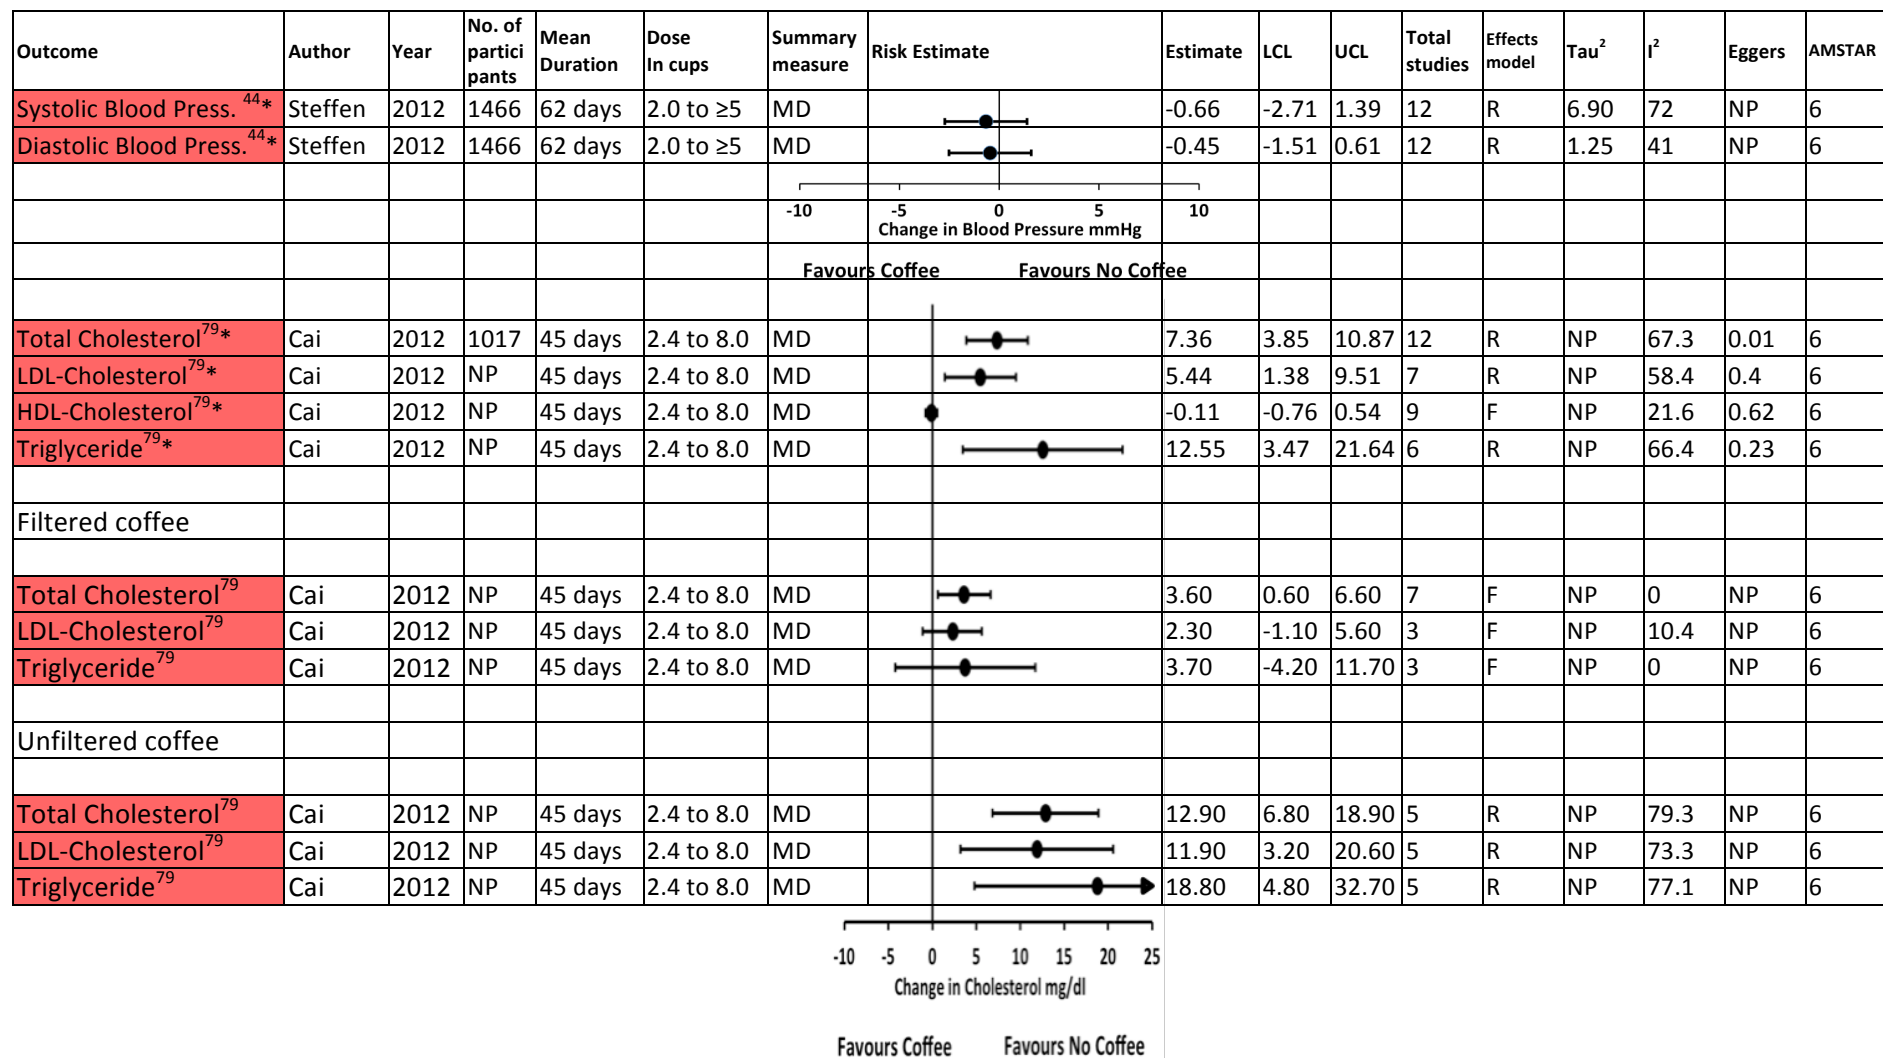

| Outcome                           | Author   | Year | No. of participants | Mean Duration | Dose In cups | Summary measure | Risk Estimate                       | Estimate | LCL    | UCL   | Total studies | Effects model | Tau <sup>2</sup> | I <sup>2</sup> | Eggers | AMSTAR |
|-----------------------------------|----------|------|---------------------|---------------|--------------|-----------------|-------------------------------------|----------|--------|-------|---------------|---------------|------------------|----------------|--------|--------|
| Caffeinated coffee                |          |      |                     |               |              |                 |                                     |          |        |       |               |               |                  |                |        |        |
| Total Cholesterol <sup>79</sup>   | Cai      | 2012 | NP                  | 45 days       | 2.4 to 8.0   | MD              |                                     | 9.20     | 5.00   | 13.40 | 12            | R             | NP               | 70.7           | NP     | 6      |
| LDL-Cholesterol <sup>79</sup>     | Cai      | 2012 | NP                  | 45 days       | 2.4 to 8.0   | MD              |                                     | 5.50     | 0.80   | 10.20 | 7             | R             | NP               | 62.8           | NP     | 6      |
| Triglyceride <sup>79</sup>        | Cai      | 2012 | NP                  | 45 days       | 2.4 to 8.0   | MD              |                                     | 13.80    | 3.70   | 24.00 | 6             | R             | NP               | 68.7           | NP     | 6      |
| Decaffeinated coffee              |          |      |                     |               |              |                 |                                     |          |        |       |               |               |                  |                |        |        |
| Total Cholesterol <sup>79</sup>   | Cai      | 2012 | NP                  | 45 days       | 2.4 to 8.0   | MD              |                                     | 3.50     | -1.10  | 8.10  | 3             | F             | NP               | 0              | NP     | 6      |
| LDL-Cholesterol <sup>79</sup>     | Cai      | 2012 | NP                  | 45 days       | 2.4 to 8.0   | MD              |                                     | 6.30     | -0.80  | 13.40 | 2             | F             | NP               | 8.7            | NP     | 6      |
| Triglyceride <sup>79</sup>        | Cai      | 2012 | NP                  | 45 days       | 2.4 to 8.0   | MD              |                                     | 3.50     | -10.60 | 17.70 | 1             | N/A           | NP               | N/A            | N/A    | 6      |
|                                   |          |      |                     |               |              |                 | -11 -6 -1 4 9 14 19 24              |          |        |       |               |               |                  |                |        |        |
|                                   |          |      |                     |               |              |                 | Change in Cholesterol mg/dl         |          |        |       |               |               |                  |                |        |        |
|                                   |          |      |                     |               |              |                 | Favours Coffee Favours No Coffee    |          |        |       |               |               |                  |                |        |        |
| Preterm Birth <sup>80</sup>       |          |      |                     |               |              |                 |                                     |          |        |       |               |               |                  |                |        |        |
| Preterm Birth <sup>80</sup>       | Jahanfar | 2015 | 1153                | 140 days      | 3.0          | RR              |                                     | 0.81     | 0.48   | 1.37  | 1             | N/A           | N/A              | N/A            | N/A    | 9      |
| Small for gest. age <sup>80</sup> | Jahanfar | 2015 | 1150                | 140 days      | 3.0          | RR              |                                     | 0.97     | 0.57   | 1.64  | 1             | N/A           | N/A              | N/A            | N/A    | 9      |
|                                   |          |      |                     |               |              |                 | 0.3 Risk Estimate 3                 |          |        |       |               |               |                  |                |        |        |
|                                   |          |      |                     |               |              |                 | Favours Coffee Favours No Coffee    |          |        |       |               |               |                  |                |        |        |
| Birth weight <sup>80</sup>        |          |      |                     |               |              |                 |                                     |          |        |       |               |               |                  |                |        |        |
| Birth weight <sup>80</sup>        | Jahanfar | 2015 | 1197                | 140 days      | 3.0          | MD              |                                     | 20.00    | -48.70 | 88.68 | 1             | N/A           | N/A              | N/A            | N/A    | 9      |
|                                   |          |      |                     |               |              |                 | -60.00 -10.00 40.00 90.00           |          |        |       |               |               |                  |                |        |        |
|                                   |          |      |                     |               |              |                 | Mean difference in birth weight (g) |          |        |       |               |               |                  |                |        |        |
|                                   |          |      |                     |               |              |                 | Favours Coffee Favours No Coffee    |          |        |       |               |               |                  |                |        |        |

\*Estimates are from our own re-analysis  
 NP = Not Published; N/A = Not Appropriate, MD=Mean Difference

|           |                |        |           |            |       |           |                 |              |                |
|-----------|----------------|--------|-----------|------------|-------|-----------|-----------------|--------------|----------------|
| Mortality | Cardiovascular | Cancer | Metabolic | Liver & GI | Renal | Pregnancy | Musculoskeletal | Neurological | Gynaecological |
|-----------|----------------|--------|-----------|------------|-------|-----------|-----------------|--------------|----------------|

## Appendix 1 References

1. Thomopoulos TP, Ntouvelis E, Diamantaras A-A, Tzanoudaki M, Baka M, Hatzipantelis E, et al. Maternal and childhood consumption of coffee, tea and cola beverages in association with childhood leukemia: a meta-analysis. *Cancer Epidemiol* [Internet]. 2015 Dec [cited 2017 May 5];39(6):1047–59. Available from: <http://www.ncbi.nlm.nih.gov/pubmed/26329264>
2. Xie Y, Qin J, Nan G, Huang S, Wang Z, Su Y, et al. Coffee consumption and the risk of lung cancer: an updated meta-analysis of epidemiological studies. *Eur J Clin Nutr* [Internet]. Y. Su, Department II of Orthopedic, Stem Cell Biology and Therapy Laboratory, Ministry of Education Key Laboratory of Child Development and Disorders, Children's Hospital of Chongqing Medical University, Chongqing Medical University, Zhongshan 2 Road 136#, England: Nature Publishing Group (Houndmills, Basingstoke, Hampshire RG21 6XS, United Kingdom); 2016 Feb;70(2):199–206. Available from: <http://www.nature.com/ejcn/index.html>
3. Li J, Zhao H, Song J-M, Zhang J, Tang Y-L, Xin C-M, et al. A meta-analysis of risk of pregnancy loss and caffeine and coffee consumption during pregnancy. *Int J Gynecol Obstet* [Internet]. C.-M. Xin, Center for Health Management, School of Health Services Management, Anhui Medical University, Hefei, Anhui 230032, China, Ireland: Elsevier Ireland Ltd; 2015 Aug;130(2):116–22. Available from: <http://www.elsevier.com/locate/ijgo>
4. Lee YH, Bae S-C, Song GG. Coffee or tea consumption and the risk of rheumatoid arthritis: a meta-analysis. *Clin Rheumatol*. Germany; 2014 Nov;33(11):1575–83.
5. Lee YH, Bae S-C, Song GG. Erratum to: Coffee or tea consumption and the risk of rheumatoid arthritis: a meta-analysis. *Clin Rheumatol* [Internet]. Springer London; 2015 Feb 10 [cited 2017 May 5];34(2):403–5. Available from: <http://link.springer.com/10.1007/s10067-014-2851-4>
6. Rhee J, Kim R, Kim Y, Tam M, Lai Y, Keum N, et al. Maternal Caffeine Consumption during Pregnancy and Risk of Low Birth Weight: A Dose-Response Meta-Analysis of Observational Studies. *PLoS One* [Internet]. United States, United States: Public Library of Science; 2015;10(7):e0132334. Available from: <http://www.plosone.org/article/fetchObject.action?uri=info:doi/10.1371/journal.pone.0132334&representation=PDF>
7. Wang A, Wang S, Zhu C, Huang H, Wu L, Wan X, et al. Coffee and cancer risk: A meta-analysis of prospective observational studies. *Sci Rep*. England; 2016 Sep;6:33711.
8. Ouyang Z, Wang Z, Jin J. Association between tea and coffee consumption and risk of laryngeal cancer: a meta-analysis. *Int J Clin Exp Med*. United States; 2014;7(12):5192–200.
9. Maslova E, Bhattacharya S, Lin S-W, Michels KB. Caffeine consumption during pregnancy and risk of preterm birth: a meta-analysis. *Am J*

Clin Nutr. United States; 2010 Nov;92(5):1120–32.

10. Browne ML. Maternal exposure to caffeine and risk of congenital anomalies: a systematic review. *Epidemiology* [Internet]. M.L. Browne, Flanigan Square, 547 River Street, Troy, NY 12180, United States. E-mail: mlb10@health.state.ny.us, United States: Lippincott Williams and Wilkins; 2006 May;17(3):324–31. Available from: <http://ovidsp.ovid.com/ovidweb.cgi?T=JS&PAGE=reference&D=emed7&NEWS=N&AN=2006242279>
11. Li S, Dai Z, Wu Q, S. L, Z. D. Effect of coffee intake on hip fracture: a meta-analysis of prospective cohort studies. *Nutr J* [Internet]. Q. Wu, Department of Orthopedics, Union Hospital, Huazhong University of Science and Technology, 1277 Jiefang Avenue, Wuhan 430022, China, England: BioMed Central Ltd.; 2015;14(1):38. Available from: <http://www.nutritionj.com/home/>
12. Zhang Z, Hu G, Caballero B, Appel L, Chen L, Z. Z, et al. Habitual coffee consumption and risk of hypertension: a systematic review and meta-analysis of prospective observational studies. *Am J Clin Nutr* [Internet]. L. Chen, Program of Epidemiology, School of Public Health, Louisiana State University Health Science Center, 1615 Poydras Street, New Orleans, LA 70112, United States. E-mail: lchen@lsuhsc.edu, United States: American Society for Nutrition (9650 Rockville Pike, Bethesda MD 20814-3998, United States); 2011 Jun;93(6):1212–9. Available from: <http://www.ajcn.org/content/93/6/1212.full.pdf+html>
13. Grosso G, Micek A, Godos J, Sciacca S, Pajak A, Martinez-Gonzalez MA, et al. Coffee consumption and risk of all-cause, cardiovascular, and cancer mortality in smokers and non-smokers: a dose-response meta-analysis. *Eur J Epidemiol* [Internet]. G. Grosso, Integrated Cancer Registry of Catania-Messina-Siracusa-Enna, Azienda Policlinico Universitaria “Vittorio Emanuele”, Via S. Sofia 85, Catania 95123, Italy. E-mail: giuseppe.grosso@studium.unict.it, Netherlands: Springer Netherlands; 2016 Dec;31(12):1191–205. Available from: <http://www.wkap.nl/journalhome.htm/0393-2990>
14. Kim J, Oh S-W, Myung S-K, Kwon H, Lee C, Yun JM, et al. Association between coffee intake and gastroesophageal reflux disease: a meta-analysis. *Dis Esophagus* [Internet]. 2014 May [cited 2017 May 5];27(4):311–7. Available from: <http://www.ncbi.nlm.nih.gov/pubmed/23795898>
15. Gan Y, Wu J, Zhang S, Li L, Cao S, Mkandawire N, et al. Association of coffee consumption with risk of colorectal cancer: a meta-analysis of prospective cohort studies. *Oncotarget* [Internet]. Z. Lu, Department of Social Medicine and Health Management, School of Public Health, Tongji Medical College, Huazhong University of Science and Technology, Wuhan, Hubei, China. E-mail: zuxunlu@yahoo.com, United States: Impact Journals LLC (E-mail: editors@impactaging.com); 2017 Mar;8(12):18699–711. Available from: <http://www.impactjournals.com/oncotarget/index.php?journal=oncotarget&page=article&op=download&path%5B%5D=8627&path%5B%5D=25797>
16. Ding M, Bhupathiraju SN, Satija A, van Dam RM, Hu FB. Long-Term Coffee Consumption and Risk of Cardiovascular Disease: A Systematic

- Review and a Dose-Response Meta-Analysis of Prospective Cohort Studies. *Circulation* [Internet]. 2014 Feb 11 [cited 2017 May 5];129(6):643–59. Available from: <http://www.ncbi.nlm.nih.gov/pubmed/24201300>
17. Han MA, Kim JH. Coffee Consumption and the Risk of Thyroid Cancer: A Systematic Review and Meta-Analysis. *Int J Environ Res Public Health*. Switzerland; 2017 Jan;14(2).
  18. Lee DR, Lee JJ, Rota M, Lee JJ, Ahn HS, Park SM, et al. Coffee consumption and risk of fractures: a systematic review and dose-response meta-analysis. *Bone* [Internet]. United States, United States; 2014 Jun;63:20–8. Available from: <http://ovidsp.ovid.com/ovidweb.cgi?T=JS&PAGE=reference&D=emed12&NEWS=N&AN=24576685>
  19. Nie K, Xing Z, Huang W, Wang W, Liu W. Coffee intake and risk of pancreatic cancer: an updated meta-analysis of prospective studies. *Minerva Med*. Italy; 2016 Aug;107(4):270–8.
  20. Malerba S, Galeone C, Pelucchi C, Turati F, Hashibe M, La Vecchia C, et al. A meta-analysis of coffee and tea consumption and the risk of glioma in adults. *Cancer Causes Control*. Netherlands; 2013 Feb;24(2):267–76.
  21. Liu Q-P, Wu Y-F, Cheng H-Y, Xia T, Ding H, Wang H, et al. Habitual coffee consumption and risk of cognitive decline/dementia: A systematic review and meta-analysis of prospective cohort studies. *Nutrition*. United States; 2016 Jun;32(6):628–36.
  22. Mostofsky E, Rice MS, Levitan EB, Mittleman MA. Habitual coffee consumption and risk of heart failure: a dose-response meta-analysis. *Circ Heart Fail* [Internet]. NIH Public Access; 2012 Jul 1 [cited 2017 May 5];5(4):401–5. Available from: <http://www.ncbi.nlm.nih.gov/pubmed/22740040>
  23. Larsson SC, Drca N, Jensen-Urstad M, Wolk A, S.C. L, N. D, et al. Coffee consumption is not associated with increased risk of atrial fibrillation: Results from two prospective cohorts and a meta-analysis. *BMC Med* [Internet]. S.C. Larsson, Karolinska Institutet, Unit of Nutritional Epidemiology, Institute of Environmental Medicine, Stockholm, Sweden, England: BioMed Central Ltd.; 2015;13(1):207. Available from: <http://www.biomedcentral.com/bmcmed/>
  24. Lippi G, Mattiuzzi C, Franchini M. Venous thromboembolism and coffee: critical review and meta-analysis. *Ann Transl Med*. China; 2015 Jul;3(11):152.
  25. Shang F, Li X, Jiang X, F. S, X. L. Coffee consumption and risk of the metabolic syndrome: A meta-analysis. *Diabetes Metab* [Internet]. X. Jiang, Department of epidemiology and health statistics, Qingdao University Medical College, No. 38 Dengzhou Road, Qingdao 266021, China. E-mail: [jiangxiubo2005@126.com](mailto:jiangxiubo2005@126.com), France: Elsevier Masson SAS (62 rue Camille Desmoulins, Issy les Moulineaux Cedex 92442, France); 2016 Apr;42(2):80–7. Available from: [http://www.elsevier.com/wps/find/journaldescription.cws\\_home/709654/description#description](http://www.elsevier.com/wps/find/journaldescription.cws_home/709654/description#description)
  26. Zhang Y-P, Li W-Q, Sun Y-L, Zhu R-T, Wang W-J, Y.-P. Z, et al. Systematic review with meta-analysis: Coffee consumption and the risk of

gallstone disease. *Aliment Pharmacol Ther* [Internet]. Y.-L. Sun, Institute of Hepatobiliary and Pancreatic Diseases, School of Medicine, Department of Hepatobiliary and Pancreatic Surgery, First Affiliated Hospital of Zhengzhou University, Zhengzhou University, 1 Jianshe Road, Zhengzhou 450052, China, England: Blackwell Publishing Ltd; 2015 Sep;42(6):637–48. Available from: [http://onlinelibrary.wiley.com/journal/10.1111/\(ISSN\)1365-2036](http://onlinelibrary.wiley.com/journal/10.1111/(ISSN)1365-2036)

27. Yu X, Bao Z, Zou J, Dong J. Coffee consumption and risk of cancers: a meta-analysis of cohort studies. *BMC Cancer*. England; 2011;11:96.
28. Caini S, Cattaruzza MS, Bendinelli B, Tosti G, Masala G, Gnagnarella P, et al. Coffee, tea and caffeine intake and the risk of non-melanoma skin cancer: a review of the literature and meta-analysis [Internet]. Vol. 56, *European Journal of Nutrition*. S. Caini, Cancer Risk Factors and Lifestyle Epidemiology Unit, Cancer Research and Prevention Institute (ISPO), Via delle Oblate 2, Florence 50139, Italy. E-mail: s.caini@ispo.toscana.it, Germany: Dr. Dietrich Steinkopff Verlag GmbH and Co. KG; 2017. p. 1. Available from: <http://www.springerlink.com/content/1436-6207>
29. Zhou Q, Luo M-L, Li H, Li M, Zhou J-G. Coffee consumption and risk of endometrial cancer: a dose-response meta-analysis of prospective cohort studies. *Sci Rep*. England; 2015;5:13410.
30. Yew YW, Lai YC, Schwartz RA, Y.W. Y, Y.C. L. Coffee Consumption and Melanoma: A Systematic Review and Meta-Analysis of Observational Studies. *Am J Clin Dermatol* [Internet]. Y.W. Yew, National Skin Centre, 1 Mandalay Road, Singapore 308205, Singapore. E-mail: yikweng.yew@mail.harvard.edu, New Zealand: Springer International Publishing; 2016 Apr;17(2):113–23. Available from: <http://link.springer.com/journal/volumesAndIssues/40257>
31. Ding M, Bhupathiraju SN, Chen M, van Dam RM, Hu FB. Caffeinated and Decaffeinated Coffee Consumption and Risk of Type 2 Diabetes: A Systematic Review and a Dose-Response Meta-analysis. *Diabetes Care* [Internet]. 2014 Feb 1 [cited 2017 May 5];37(2):569–86. Available from: <http://www.ncbi.nlm.nih.gov/pubmed/24459154>
32. Liu F, Wang X, Wu G, Chen L, Hu P, Ren H, et al. Coffee Consumption Decreases Risks for Hepatic Fibrosis and Cirrhosis: A Meta-Analysis. *PLoS One* [Internet]. Public Library of Science; 2015 [cited 2017 Feb 1];10(11):e0142457. Available from: <http://www.ncbi.nlm.nih.gov/pubmed/26556483>
33. Wang S, Zhang Y, Mao Z, He X, Zhang Q, Zhang D, et al. A meta-analysis of coffee intake and risk of urolithiasis. *Urol Int* [Internet]. D. Zhang, Department of Urology, Zhejiang Provincial People's Hospital, Zhejiang University, Shangtang Road 158, Hangzhou, Zhejiang Province 310014, China, Switzerland: S. Karger AG; 2014;93(2):220–8. Available from: [http://www.karger.com/journals/uin/uin\\_jh.htm](http://www.karger.com/journals/uin/uin_jh.htm)
34. Qi H, Li S. Dose-response meta-analysis on coffee, tea and caffeine consumption with risk of Parkinson's disease. *Geriatr Gerontol Int*. Japan; 2014 Apr;14(2):430–9.
35. Brown OI, Allgar V, Wong KY-K. Coffee reduces the risk of death after acute myocardial infarction. *Coron Artery Dis* [Internet]. 2016 Nov

[cited 2017 May 5];27(7):566–72. Available from:

<http://content.wkhealth.com/linkback/openurl?sid=WKPTLP:landingpage&an=00019501-201611000-00008>

36. Park KY, Kim HJ, Ahn HS, Kim SH, Park EJ, Yim S-Y, et al. Effects of coffee consumption on serum uric acid: Systematic review and meta-analysis. *Semin Arthritis Rheum* [Internet]. S.-Y. Yim, Department of Physical Medicine and Rehabilitation, Ajou University School of Medicine, Worldcup-ro 164, Yeongtong-gu, Suwon 16499, South Korea. E-mail: [syyim@ajou.ac.kr](mailto:syyim@ajou.ac.kr); W.B. Saunders; 2016 Jan;45(5):580–6. Available from: <http://www.elsevier.com/inca/publications/store/6/2/3/3/3/2/index.htm>
37. Bravi F, Tavani A, Bosetti C, Boffetta P, La Vecchia C. Coffee and the risk of hepatocellular carcinoma and chronic liver disease: a systematic review and meta-analysis of prospective studies. *Eur J Cancer Prev*. England; 2016 Apr;
38. Yan K, Xu X, Liu X, Wang X, Hua S, Wang C, et al. The associations between maternal factors during pregnancy and the risk of childhood acute lymphoblastic leukemia: A meta-analysis. *Pediatr Blood Cancer* [Internet]. 2015 Jul [cited 2017 May 5];62(7):1162–70. Available from: <http://www.ncbi.nlm.nih.gov/pubmed/25728190>
39. Yan K, Xu X, Liu X, Wang X, Hua S, Wang C, et al. Corrigendum: The Associations Between Maternal Factors During Pregnancy and the Risk of Childhood Acute Lymphoblastic Leukemia: A Meta-Analysis. [Internet]. Vol. 63, *Pediatric Blood & Cancer*. Epidemiology and Statistics, School of Public Health, Jilin University: John Wiley & Sons, Inc.; 2016. p. 953–4. Available from: <http://search.ebscohost.com/login.aspx?direct=true&db=rzh&AN=113881373&site=ehost-live>
40. Han T, Li J, Wang L, Xu H. Coffee and the Risk of Lymphoma: A Meta-analysis Article. *Iran J Public Health*. Iran; 2016 Sep;45(9):1126–35.
41. Galarraga V, Boffetta P. Coffee Drinking and Risk of Lung Cancer—A Meta-Analysis. *Cancer Epidemiol Prev Biomarkers*. 2016;25(6).
42. Zeegers MP, Tan FE, Goldbohm RA, van den Brandt PA, M.P.A. Z, F.E.S. T, et al. Are coffee and tea consumption associated with urinary tract cancer risk? A systematic review and meta-analysis. *Int J Epidemiol* [Internet]. M.P.A. Zeegers, Maastricht University, Department of Epidemiology, PO Box 616, 6200 MD Maastricht, Netherlands. E-mail: [mpa.zeegers@epid.unimaas.nl](mailto:mpa.zeegers@epid.unimaas.nl), England: Oxford University Press; 2001 Apr;30(2):353–62. Available from: <http://ovidsp.ovid.com/ovidweb.cgi?T=JS&PAGE=reference&D=emed5&NEWS=N&AN=2001180342>
43. Chiaffarino F, Bravi F, Cipriani S, Parazzini F, Ricci E, Vigano P, et al. Coffee and caffeine intake and risk of endometriosis: a meta-analysis. *Eur J Nutr*. Germany; 2014 Oct;53(7):1573–9.
44. Steffen M, Kuhle C, Hensrud D, Erwin PJ, Murad MH, M. S, et al. The effect of coffee consumption on blood pressure and the development of hypertension: A systematic review and meta-analysis. *J Hypertens* [Internet]. M. Steffen, Division of Preventive, Occupational, Aerospace Medicine Occupational, Aerospace Medicine, Mayo Clinic, 200 First Street SW, Rochester, MN 55905, United States. E-mail: [Steffen.mark@mayo.edu](mailto:Steffen.mark@mayo.edu), England: Lippincott Williams and Wilkins (250 Waterloo Road, London SE1 8RD, United

Kingdom); 2012 Dec;30(12):2245–54. Available from:

<http://ovidsp.ovid.com/ovidweb.cgi?T=JS&PAGE=reference&D=emed10b&NEWS=N&AN=2012696901>

45. Fang X, Wei J, He X, An P, Wang H, Jiang L, et al. Landscape of dietary factors associated with risk of gastric cancer: A systematic review and dose-response meta-analysis of prospective cohort studies. *Eur J Cancer*. England; 2015 Dec;51(18):2820–32.
46. Galeone C, Turati F, La Vecchia C, Tavani A. Coffee consumption and risk of colorectal cancer: a meta-analysis of case-control studies. *Cancer Causes Control* [Internet]. 2010 Nov 1 [cited 2017 May 5];21(11):1949–59. Available from: <http://www.ncbi.nlm.nih.gov/pubmed/20680435>
47. Mack WJ, Preston-Martin S, Dal Maso L, Galanti R, Xiang M, Franceschi S, et al. A pooled analysis of case-control studies of thyroid cancer: cigarette smoking and consumption of alcohol, coffee, and tea. *Cancer Causes Control*. Netherlands; 2003 Oct;14(8):773–85.
48. Zhang R, Wang Y, Song B, Jørgensen H, Xu Y. Coffee consumption and risk of stroke: a meta-analysis of cohort studies. *Open Med* [Internet]. SP Versita; 2012 Jan 1 [cited 2017 May 5];7(3):310–6. Available from: <http://www.degruyter.com/view/j/med.2012.7.issue-3/s11536-011-0154-6/s11536-011-0154-6.xml>
49. Cao S, Liu L, Yin X, Wang Y, Liu J, Lu Z. Coffee consumption and risk of prostate cancer: a meta-analysis of prospective cohort studies. *Carcinogenesis* [Internet]. 2014 Feb 1 [cited 2017 May 5];35(2):256–61. Available from: <http://www.ncbi.nlm.nih.gov/pubmed/24343360>
50. Li Z-X, Gao Z-L, Wang J-N, Guo Q-H, Z.-X. L, Z.-L. G, et al. Maternal Coffee Consumption During Pregnancy and Neural Tube Defects in Offspring: A Meta-Analysis. *Fetal Pediatr Pathol* [Internet]. J.-N. Wang, Zhejiang Provincial Center for Disease Control and Prevention, Hangzhou, China. E-mail: [mwang@cdc.zj.cn](mailto:mwang@cdc.zj.cn), England: Taylor and Francis Ltd; 2016;35(1):1–9. Available from: <http://ovidsp.ovid.com/ovidweb.cgi?T=JS&PAGE=reference&D=emed13&NEWS=N&AN=20160009098>
51. Bravi F, Scotti L, Bosetti C, Gallus S, Negri E, La Vecchia C, et al. Coffee drinking and endometrial cancer risk: a metaanalysis of observational studies. *Am J Obstet Gynecol*. United States; 2009 Feb;200(2):130–5.
52. Sun S, Liu D, Jiao Z, S. S, D. L. Coffee and caffeine intake and risk of urinary incontinence: a meta-analysis of observational studies. *BMC Urol* [Internet]. Department of General surgery, Linyi People’s Hospital, Shandong 276000, People’s Republic of China: BioMed Central Ltd. (E-mail: [info@biomedcentral.com](mailto:info@biomedcentral.com)); 2016 Oct 6;16(1):1–7. Available from: <http://www.biomedcentral.com/bmcurol>
53. Barranco Quintana JL, Allam MF, Serrano Del Castillo A, Fernandez-Crehuet Navajas R. Alzheimer’s disease and coffee: a quantitative review. *Neurol Res*. England; 2007 Jan;29(1):91–5.
54. Wijarnpreecha K, Thongprayoon C, Thamcharoen N, Panjawatanan P, Cheungpasitporn W, K. W, et al. Association of coffee consumption and chronic kidney disease: A meta-analysis. *Int J Clin Pract* [Internet]. K. Wijarnpreecha, Department of Internal Medicine,



Bassett Medical Center, Cooperstown, NY, United States. E-mail: dr.karn.wi@gmail.com, England: Blackwell Publishing Ltd (E-mail: customerservices@oxonblackwellpublishing.com); 2017 Jan;71(1):e12919. Available from: [http://onlinelibrary.wiley.com/journal/10.1111/\(ISSN\)1742-1241](http://onlinelibrary.wiley.com/journal/10.1111/(ISSN)1742-1241)

55. Wijarnpreecha K, Thongprayoon C, Ungprasert P, K. W, C. T. Coffee consumption and risk of nonalcoholic fatty liver disease: A systematic review and meta-analysis. *Eur J Gastroenterol Hepatol* [Internet]. K. Wijarnpreecha, Department of Internal Medicine, Bassett Medical Center, One Atwell Road, Cooperstown, NY 13326, United States. E-mail: dr.karn.wi@gmail.com, England: Lippincott Williams and Wilkins (E-mail: agents@lww.com); 2017 Feb;29(2):e8–12. Available from: <http://journals.lww.com/eurojgh/pages/default.aspx>
56. Noyce AJ, Bestwick JP, Silveira-Moriyama L, Hawkes CH, Giovannoni G, Lees AJ, et al. Meta-analysis of early nonmotor features and risk factors for Parkinson disease. *Ann Neurol* [Internet]. Institute of Neurology, University College London, London, United Kingdom; Blizard Institute of Cell and Molecular Science, Barts and the London School of Medicine and Dentistry, Queen Mary University of London, London, United Kingdom., United States: John Wiley and Sons Inc. (P.O.Box 18667, Newark NJ 07191-8667, United States); 2012 Dec;72(6):893–901. Available from: <http://search.ebscohost.com/login.aspx?direct=true&db=rzh&AN=104296084&site=ehost-live>
57. Chen L-W, Wu Y, Neelakantan N, Chong MF-F, Pan A, van Dam RM. Maternal caffeine intake during pregnancy is associated with risk of low birth weight: a systematic review and dose-response meta-analysis. *BMC Med*. England; 2014;12:174.
58. Wu W, Tong Y, Zhao Q, Yu G, Wei X, Lu Q. Coffee consumption and bladder cancer: a meta-analysis of observational studies. *Sci Rep*. England; 2015;5:9051.
59. Liu H, Yao K, Zhang W, Zhou J, Wu T, He C, et al. Coffee consumption and risk of fractures: a meta-analysis. *Arch Med Sci* [Internet]. C. He, Department of Rehabilitation, West China Hospital, Sichuan University, Chengdu, Sichuan, 610041, China. E-mail: chengqi.he3477@gmail.com, Poland: Termedia Publishing House Ltd. (Kleeberqa St.2, Poznan 61-615, Poland); 2012 Nov;8(5):776–83. Available from: [http://www.termedia.pl/Journal/-19/pdf-19705-10?filename=Coffee consumption.pdf](http://www.termedia.pl/Journal/-19/pdf-19705-10?filename=Coffee%20consumption.pdf)
60. Zeng S-B, Weng H, Zhou M, Duan X-L, Shen X-F, Zeng X-T, et al. Long-Term Coffee Consumption and Risk of Gastric Cancer: A PRISMA-Compliant Dose-Response Meta-Analysis of Prospective Cohort Studies. *Med (United States)* [Internet]. X.-T. Zeng, Center for Evidence-Based and Translational Medicine, Zhongnan Hospital, Wuhan University, 169 Donghu Road, Wuchang District, Wuhan 430071, China, United States: Lippincott Williams and Wilkins; 2015 Sep;94(38):e1640. Available from: <http://journals.lww.com/md-journal>
61. Braem MGM, Onland-Moret NC, Schouten LJ, Tjonneland A, Hansen L, Dahm CC, et al. Coffee and tea consumption and the risk of ovarian cancer: A prospective cohort study and updated meta-analysis. *Am J Clin Nutr* [Internet]. M.G.M. Braem, Mailbox Str 6.131, 3508 GA Utrecht, Netherlands. E-mail: m.g.m.braem@umcutrecht.nl, United States: American Society for Nutrition (9650 Rockville Pike,

Bethesda MD 20814-3998, United States); 2012 May;95(5):1172–81. Available from:

<http://www.ajcn.org/content/95/5/1172.full.pdf+html>

62. Malerba S, Turati F, Galeone C, Pelucchi C, Verga F, La Vecchia C, et al. A meta-analysis of prospective studies of coffee consumption and mortality for all causes, cancers and cardiovascular diseases. *Eur J Epidemiol* [Internet]. 2013 Jul 11 [cited 2017 May 4];28(7):527–39. Available from: <http://www.ncbi.nlm.nih.gov/pubmed/23934579>
63. Zheng J-S, Yang J, Fu Y-Q, Huang T, Huang Y-J, Li D. Effects of green tea, black tea, and coffee consumption on the risk of esophageal cancer: a systematic review and meta-analysis of observational studies. *Nutr Cancer*. United States; 2013;65(1):1–16.
64. Li X-L, Xu J-H. Coffee consumption and hip fracture risk: a meta-analysis. *J Nutr Sci*. England; 2013;2:e23.
65. Li XJ, Ren ZJ, Qin JW, Zhao JH, Tang JH, Ji MH, et al. Coffee Consumption and Risk of Breast Cancer: An Up-To-Date Meta-Analysis. Aboussekhra A, editor. *PLoS One* [Internet]. 2013 Jan 4 [cited 2017 May 5];8(1):e52681. Available from: <http://www.ncbi.nlm.nih.gov/pubmed/23308117>
66. Ran H-Q, Wang J-Z, Sun C-Q. Coffee Consumption and Pancreatic Cancer Risk: An Update Meta-analysis of Cohort Studies. *Pakistan J Med Sci* [Internet]. Professional Medical Publications; 2016 [cited 2017 May 5];32(1):253–9. Available from: <http://www.ncbi.nlm.nih.gov/pubmed/27022386>
67. Wang J, Li X, Zhang D. Coffee consumption and the risk of cutaneous melanoma: a meta-analysis. *Eur J Nutr*. 2015 Dec;
68. Huang T, Guo Z, Zhang XX, Zhang XX, Liu H, Geng J, et al. Coffee consumption and urologic cancer risk: a meta-analysis of cohort studies. *Int Urol Nephrol* [Internet]. J.-H. Zheng, Department of Urology, Shanghai Tenth People’s Hospital, Tongji University, 301 Yanchang Road, Shanghai 200072, China. E-mail: zhengjh\_nyo8@163.com, Netherlands: Kluwer Academic Publishers; 2014 Aug;46(8):1481–93. Available from: <http://www.wkap.nl/journalhome.htm/0301-1623>
69. Je Y, Giovannucci E. Coffee consumption and total mortality: a meta-analysis of twenty prospective cohort studies. *Br J Nutr*. England; 2014 Apr;111(7):1162–73.
70. Jiang X, Zhang D, Jiang W, X. J, D. Z. Coffee and caffeine intake and incidence of type 2 diabetes mellitus: a meta-analysis of prospective studies. *Eur J Nutr* [Internet]. D. Zhang, Department of Epidemiology and Health Statistics, Medical College, Qingdao University, No. 38 Dongzhou Road, Qingdao, 266021 Shandong, China. E-mail: zhangdf1962@aliyun.com, Germany: D. Steinkopff-Verlag (P.O. Box 100462, Darmstadt D-64204, Germany); 2014 Feb;53(1):25–38. Available from: <http://ovidsp.ovid.com/ovidweb.cgi?T=JS&PAGE=reference&D=emed12&NEWS=N&AN=2014092517>
71. Wang L, Shen X, Wu Y, Zhang D. Coffee and caffeine consumption and depression: A meta-analysis of observational studies. *Aust N Z J Psychiatry*. 2015 Sep;

72. Hernán MA, Takkouche B, Caamaño-Isorna F, Gestal-Otero JJ. A meta-analysis of coffee drinking, cigarette smoking, and the risk of Parkinson's disease. *Ann Neurol* [Internet]. 2002 Sep [cited 2017 May 5];52(3):276–84. Available from: <http://www.ncbi.nlm.nih.gov/pubmed/12205639>
73. Kennedy OJ, Roderick P, Buchanan R, Fallowfield JA, Hayes PC, Parkes J, et al. Systematic review with meta-analysis: Coffee consumption and the risk of cirrhosis. *Aliment Pharmacol Ther* [Internet]. O.J. Kennedy, Primary Care and Population Sciences, Faculty of Medicine, University of Southampton, Southampton, United Kingdom. E-mail: [ok4g13@soton.ac.uk](mailto:ok4g13@soton.ac.uk), England: Blackwell Publishing Ltd (E-mail: [customerservices@oxonblackwellpublishing.com](mailto:customerservices@oxonblackwellpublishing.com)); 2016 Mar;43(5):562–74. Available from: [http://onlinelibrary.wiley.com/journal/10.1111/\(ISSN\)1365-2036](http://onlinelibrary.wiley.com/journal/10.1111/(ISSN)1365-2036)
74. Sofi F, Conti AA, Gori AM, Eliana Luisi ML, Casini A, Abbate R, et al. Coffee consumption and risk of coronary heart disease: a meta-analysis. *Nutr Metab Cardiovasc Dis* [Internet]. F. Sofi, Department of Medical and Surgical Critical Care, Center for the Study at Molecular and Clinical Level of Chronic, Degenerative and Neoplastic Diseases to Develop Novel Therapies, Florence, Italy. E-mail: [francescosofi@gmail.com](mailto:francescosofi@gmail.com), Germany: Elsevier; 2007 Mar;17(3):209–23. Available from: <http://ovidsp.ovid.com/ovidweb.cgi?T=JS&PAGE=reference&D=emed8&NEWS=N&AN=17156982>
75. Jiang W, Wu Y, Jiang X. Coffee and caffeine intake and breast cancer risk: an updated dose-response meta-analysis of 37 published studies. *Gynecol Oncol*. United States; 2013 Jun;129(3):620–9.
76. Liu J, Shen B, Shi M, Cai J. Higher Caffeinated Coffee Intake Is Associated with Reduced Malignant Melanoma Risk: A Meta-Analysis Study. *PLoS One*. United States; 2016;11(1):e0147056.
77. Tang N, Wu Y, Ma J, Wang B, Yu R, N. T, et al. Coffee consumption and risk of lung cancer: A meta-analysis. *Lung Cancer* [Internet]. N. Tang, National Shanghai Center for New Drug Safety Evaluation and Research, Shanghai Institute of Pharmaceutical Industry, Zhangjiang Hi-Tech Park, 199 Guoshoujing Road, Pudong, Shanghai, 201203, China. E-mail: [naping.tang@gmail.com](mailto:naping.tang@gmail.com), Ireland: Elsevier Ireland Ltd (P.O. Box 85, Limerick, Ireland); 2010 Jan;67(1):17–22. Available from: <http://ovidsp.ovid.com/ovidweb.cgi?T=JS&PAGE=reference&D=emed9&NEWS=N&AN=2009628084>
78. Kennedy OJ, Roderick P, Buchanan R, Fallowfield JA, Hayes PC, Parkes J. Coffee, including caffeinated and decaffeinated coffee, and the risk of hepatocellular carcinoma: a systematic review and dose–response meta-analysis. *BMJ Open* [Internet]. 2017 May 9 [cited 2017 May 18];7(5):e013739. Available from: <http://bmjopen.bmj.com/lookup/doi/10.1136/bmjopen-2016-013739>
79. Cai L, Ma D, Zhang Y, Liu Z, Wang P. The effect of coffee consumption on serum lipids: a meta-analysis of randomized controlled trials. *Eur J Clin Nutr*. England; 2012 Aug;66(8):872–7.
80. Jahanfar S, Jaafar SH. Effects of restricted caffeine intake by mother on fetal, neonatal and pregnancy outcomes. In: Jahanfar S, editor.

Cochrane Database of Systematic Reviews [Internet]. Chichester, UK: John Wiley & Sons, Ltd; 2015 [cited 2017 May 5]. Available from: <http://doi.wiley.com/10.1002/14651858.CD006965.pub4>
