# Supplementary material for: Coffee consumption and health: umbrella review of meta-analyses of multiple health outcomes
Source: PubMed Central journal article supplement — BMJ. 2017 Nov 21;359:j5024. doi: 10.1136/bmj.j5024 (PMC5696634; doi:10.1136/bmj.j5024), 2017-11-21
Supplement: poor039281.ww3.pdf [file poor039281.ww3.pdf]

### Appendix 3: AMSTAR scores for individual studies included in the umbrella review [posted as supplied by author]

AMSTAR scores for individual studies representing highest form of evidence

| Outcome                                 | Assessed with         | Author                     | Year | A priori design provided | Duplicate study selection & data extraction | At least two electronic databases searched | Status of publication used as an inclusion criteria | List of included AND excluded studies provided | Characteristics of included studies provided | Scientific quality of included studies assessed | scientific quality of the included studies used appropriately to form conclusions | Appropriate methods to combine studies | Publication bias assessed | Conflict of interest included | Total AMSTAR Score |
|-----------------------------------------|-----------------------|----------------------------|------|--------------------------|---------------------------------------------|--------------------------------------------|-----------------------------------------------------|------------------------------------------------|----------------------------------------------|-------------------------------------------------|-----------------------------------------------------------------------------------|----------------------------------------|---------------------------|-------------------------------|--------------------|
| 1 <sup>st</sup> Trimester Preterm Birth | HIGH versus LOW       | Maslova <sup>85</sup>      | 2010 | 0                        | 0                                           | 1                                          | 0                                                   | 0                                              | 1                                            | 0                                               | 0                                                                                 | 0                                      | 1                         | 1                             | 4                  |
| 2 <sup>nd</sup> Trimester Preterm Birth | HIGH versus LOW       | Maslova <sup>85</sup>      | 2010 | 0                        | 0                                           | 1                                          | 0                                                   | 0                                              | 1                                            | 0                                               | 0                                                                                 | 0                                      | 1                         | 1                             | 4                  |
| 3 <sup>rd</sup> Trimester Preterm Birth | HIGH versus LOW       | Maslova <sup>85</sup>      | 2010 | 0                        | 0                                           | 1                                          | 0                                                   | 0                                              | 1                                            | 0                                               | 0                                                                                 | 0                                      | 1                         | 1                             | 4                  |
| Acute Leukaemia of Child.               | HIGH versus LOW       | Thomopoulou <sup>89</sup>  | 2015 | 0                        | 1                                           | 0                                          | 0                                                   | 0                                              | 1                                            | 1                                               | 0                                                                                 | 1                                      | 1                         | 0                             | 5                  |
| All Cancer                              | 1 extra cup/day       | Yu <sup>38</sup>           | 2011 | 0                        | 1                                           | 1                                          | 0                                                   | 0                                              | 1                                            | 0                                               | 0                                                                                 | 1                                      | 1                         | 1                             | 6                  |
| All-cause Mortality                     | NLDR                  | Grosso <sup>28</sup>       | 2016 | 0                        | 0                                           | 1                                          | 0                                                   | 0                                              | 1                                            | 0                                               | 0                                                                                 | 1                                      | 1                         | 1                             | 5                  |
| Alzheimer's Disease                     | 1 extra cup/day       | Liu <sup>82</sup>          | 2016 | 0                        | 1                                           | 1                                          | 0                                                   | 0                                              | 1                                            | 1                                               | 0                                                                                 | 1                                      | 1                         | 0                             | 6                  |
| Atrial Fibrillation                     | 1 extra cup/day       | Larsson <sup>32</sup>      | 2015 | 0                        | 0                                           | 1                                          | 0                                                   | 0                                              | 1                                            | 0                                               | 0                                                                                 | 1                                      | 1                         | 1                             | 5                  |
| Birthweight                             | Coffee versus Control | Jahanfar <sup>88</sup>     | 2015 | 1                        | 1                                           | 1                                          | 1                                                   | 1                                              | 1                                            | 1                                               | 0                                                                                 | 1                                      | 0                         | 1                             | 1                  |
| Bladder Cancer                          | 1 extra cup/day       | Wu <sup>135</sup>          | 2015 | 0                        | 1                                           | 1                                          | 0                                                   | 0                                              | 1                                            | 1                                               | 1                                                                                 | 1                                      | 1                         | 1                             | 8                  |
| Breast Cancer                           | 1 extra cup/day       | Li <sup>56</sup>           | 2013 | 0                        | 0                                           | 1                                          | 0                                                   | 0                                              | 1                                            | 0                                               | 0                                                                                 | 1                                      | 1                         | 1                             | 5                  |
| Cancer Mortality                        | NLDR                  | Grosso <sup>28</sup>       | 2016 | 0                        | 0                                           | 1                                          | 0                                                   | 0                                              | 1                                            | 0                                               | 0                                                                                 | 1                                      | 1                         | 1                             | 5                  |
| Cardiovascular Disease                  | HIGH versus LOW       | Ding <sup>19</sup>         | 2014 | 0                        | 0                                           | 1                                          | 0                                                   | 0                                              | 1                                            | 1                                               | 1                                                                                 | 1                                      | 1                         | 1                             | 7                  |
| Cardiovascular Malf.                    | HIGH versus LOW       | Browne <sup>87</sup>       | 2006 | 0                        | 0                                           | 1                                          | 0                                                   | 0                                              | 1                                            | 0                                               | 0                                                                                 | 0                                      | 0                         | 0                             | 2                  |
| CHD Mortality                           | NLDR                  | Grosso <sup>28</sup>       | 2016 | 0                        | 0                                           | 1                                          | 0                                                   | 0                                              | 1                                            | 0                                               | 0                                                                                 | 1                                      | 1                         | 1                             | 5                  |
| Chronic Liver Disease                   | 1 extra cup/day       | Bravi <sup>43</sup>        | 2016 | 0                        | 0                                           | 1                                          | 0                                                   | 0                                              | 1                                            | 1                                               | 0                                                                                 | 1                                      | 1                         | 1                             | 6                  |
| Cirrhosis                               | 1 extra cup/day       | Kennedy <sup>9</sup>       | 2016 | 1                        | 1                                           | 1                                          | 0                                                   | 0                                              | 1                                            | 1                                               | 1                                                                                 | 1                                      | 1                         | 1                             | 9                  |
| Cirrhosis Mortality                     | 1 extra cup/day       | Kennedy <sup>9</sup>       | 2016 | 1                        | 1                                           | 1                                          | 0                                                   | 0                                              | 1                                            | 1                                               | 1                                                                                 | 1                                      | 1                         | 1                             | 9                  |
| CKD                                     | ANY versus NONE       | Wijarnpreec. <sup>71</sup> | 2016 | 0                        | 1                                           | 1                                          | 0                                                   | 0                                              | 1                                            | 1                                               | 0                                                                                 | 1                                      | 1                         | 1                             | 7                  |
| Cognitive Decline                       | 1 extra cup/day       | Liu <sup>82</sup>          | 2016 | 0                        | 1                                           | 1                                          | 0                                                   | 0                                              | 1                                            | 1                                               | 0                                                                                 | 1                                      | 1                         | 0                             | 6                  |
| Colon Cancer                            | 1 extra cup/day       | Gan <sup>20</sup>          | 2017 | 0                        | 1                                           | 1                                          | 0                                                   | 1                                              | 1                                            | 1                                               | 0                                                                                 | 1                                      | 1                         | 1                             | 8                  |
| Colorectal Cancer                       | 1 extra cup/day       | Gan <sup>20</sup>          | 2017 | 0                        | 1                                           | 1                                          | 0                                                   | 1                                              | 1                                            | 1                                               | 0                                                                                 | 1                                      | 1                         | 1                             | 8                  |
| Coronary Heart Disease                  | HIGH versus LOW       | Ding <sup>19</sup>         | 2014 | 0                        | 0                                           | 1                                          | 0                                                   | 0                                              | 1                                            | 1                                               | 1                                                                                 | 1                                      | 1                         | 1                             | 7                  |
| CVD Mortality                           | NLDR                  | Grosso <sup>28</sup>       | 2016 | 0                        | 0                                           | 1                                          | 0                                                   | 0                                              | 1                                            | 0                                               | 0                                                                                 | 1                                      | 1                         | 1                             | 5                  |
| Depression                              | 1 extra cup/day       | Wang <sup>81</sup>         | 2016 | 0                        | 1                                           | 1                                          | 0                                                   | 0                                              | 1                                            | 0                                               | 0                                                                                 | 1                                      | 1                         | 1                             | 6                  |
| Diastolic Blood Pressure                | Coffee versus Control | Steffen <sup>35</sup>      | 2012 | 0                        | 0                                           | 1                                          | 0                                                   | 0                                              | 1                                            | 1                                               | 0                                                                                 | 1                                      | 0                         | 1                             | 5                  |
| Endometrial Cancer                      | 1 extra cup/day       | Wang <sup>39</sup>         | 2016 | 0                        | 1                                           | 1                                          | 0                                                   | 0                                              | 1                                            | 0                                               | 0                                                                                 | 1                                      | 0                         | 1                             | 5                  |
| Endometriosis                           | ANY versus NONE       | Chiaffarino <sup>83</sup>  | 2014 | 0                        | 0                                           | 1                                          | 0                                                   | 0                                              | 1                                            | 0                                               | 0                                                                                 | 1                                      | 1                         | 0                             | 4                  |
| Fracture                                | 1 extra cup/day       | Liu <sup>73</sup>          | 2012 | 0                        | 0                                           | 1                                          | 0                                                   | 0                                              | 1                                            | 1                                               | 0                                                                                 | 1                                      | 1                         | 1                             | 6                  |
| Gallstones                              | 1 extra cup/day       | Zhang <sup>25</sup>        | 2015 | 0                        | 1                                           | 1                                          | 0                                                   | 0                                              | 1                                            | 1                                               | 1                                                                                 | 1                                      | 1                         | 1                             | 8                  |
| Gastric Cancer                          | 1 extra cup/day       | Zeng <sup>21</sup>         | 2015 | 0                        | 1                                           | 1                                          | 0                                                   | 0                                              | 1                                            | 1                                               | 1                                                                                 | 1                                      | 1                         | 1                             | 8                  |

| Outcome                   | Assessed with         | Author                     | Year | A priori design provided | Duplicate study selection & data extraction | At least two electronic databases searched | Status of publication used as an inclusion criteria | List of included AND excluded studies provided | Characteristics of included studies provided | Scientific quality of included studies assessed | scientific quality of the included studies used appropriately to form conclusions | Appropriate methods to combine studies | Publication bias assessed | Conflict of interest included | Total AMSTAR Score |
|---------------------------|-----------------------|----------------------------|------|--------------------------|---------------------------------------------|--------------------------------------------|-----------------------------------------------------|------------------------------------------------|----------------------------------------------|-------------------------------------------------|-----------------------------------------------------------------------------------|----------------------------------------|---------------------------|-------------------------------|--------------------|
| Glioma                    | 1 extra cup/day       | Malerba <sup>61</sup>      | 2012 | 0                        | 0                                           | 1                                          | 0                                                   | 0                                              | 1                                            | 0                                               | 0                                                                                 | 1                                      | 1                         | 1                             | 5                  |
| GORD                      | HIGH versus LOW       | Kim <sup>66</sup>          | 2013 | 0                        | 0                                           | 1                                          | 0                                                   | 0                                              | 1                                            | 1                                               | 1                                                                                 | 1                                      | 1                         | 0                             | 6                  |
| Gout                      | HIGH versus LOW       | Park <sup>69</sup>         | 2016 | 0                        | 1                                           | 1                                          | 0                                                   | 0                                              | 1                                            | 1                                               | 1                                                                                 | 1                                      | 0                         | 0                             | 6                  |
| HDL-Cholesterol           | Coffee versus Control | Cai <sup>36</sup>          | 2012 | 0                        | 0                                           | 1                                          | 0                                                   | 0                                              | 1                                            | 0                                               | 0                                                                                 | 1                                      | 1                         | 1                             | 5                  |
| Heart Failure             | HIGH versus LOW       | Mostofsky <sup>24</sup>    | 2012 | 0                        | 0                                           | 1                                          | 0                                                   | 0                                              | 1                                            | 0                                               | 0                                                                                 | 1                                      | 1                         | 1                             | 5                  |
| Hip Fracture              | 1 extra cup/day       | Li <sup>75</sup>           | 2013 | 0                        | 0                                           | 1                                          | 0                                                   | 0                                              | 1                                            | 0                                               | 0                                                                                 | 0                                      | 1                         | 1                             | 4                  |
| Hypertension              | HIGH versus LOW       | Zhang <sup>34</sup>        | 2011 | 0                        | 0                                           | 1                                          | 0                                                   | 0                                              | 1                                            | 0                                               | 0                                                                                 | 1                                      | 1                         | 1                             | 5                  |
| Laryngeal Cancer          | HIGH versus LOW       | Ouyang <sup>59</sup>       | 2014 | 0                        | 1                                           | 1                                          | 0                                                   | 0                                              | 1                                            | 0                                               | 0                                                                                 | 1                                      | 1                         | 1                             | 6                  |
| LDL-Cholesterol           | Coffee versus Control | Cai <sup>36</sup>          | 2012 | 0                        | 0                                           | 1                                          | 0                                                   | 0                                              | 1                                            | 0                                               | 0                                                                                 | 1                                      | 1                         | 1                             | 5                  |
| Leukaemia                 | HIGH versus LOW       | Yu <sup>38</sup>           | 2011 | 0                        | 1                                           | 1                                          | 0                                                   | 0                                              | 1                                            | 0                                               | 0                                                                                 | 0                                      | 1                         | 1                             | 5                  |
| Liver Cancer              | 1 extra cup/day       | Bravi <sup>43</sup>        | 2016 | 0                        | 0                                           | 1                                          | 0                                                   | 0                                              | 1                                            | 1                                               | 0                                                                                 | 1                                      | 1                         | 1                             | 6                  |
| Liver Fibrosis            | ANY versus NONE       | Liu <sup>63</sup>          | 2015 | 0                        | 0                                           | 1                                          | 0                                                   | 0                                              | 1                                            | 1                                               | 1                                                                                 | 1                                      | 1                         | 1                             | 7                  |
| Low Birth Weight          | 1 extra cup/day       | Chen <sup>134</sup>        | 2014 | 0                        | 1                                           | 1                                          | 0                                                   | 0                                              | 1                                            | 1                                               | 0                                                                                 | 1                                      | 1                         | 1                             | 7                  |
| Lung Cancer               | 1 extra cup/day       | Galarraga <sup>47</sup>    | 2016 | 0                        | 0                                           | 1                                          | 0                                                   | 0                                              | 1                                            | 0                                               | 0                                                                                 | 1                                      | 1                         | 1                             | 5                  |
| Lymphoma                  | HIGH versus LOW       | Wang <sup>39</sup>         | 2016 | 0                        | 1                                           | 1                                          | 0                                                   | 0                                              | 1                                            | 0                                               | 0                                                                                 | 1                                      | 0                         | 1                             | 5                  |
| Melanoma                  | 1 extra cup/day       | Wang <sup>45</sup>         | 2015 | 0                        | 1                                           | 1                                          | 0                                                   | 0                                              | 1                                            | 1                                               | 1                                                                                 | 1                                      | 1                         | 1                             | 8                  |
| Metabolic Syndrome        | HIGH versus LOW       | Shang <sup>26</sup>        | 2015 | 0                        | 1                                           | 1                                          | 0                                                   | 0                                              | 1                                            | 0                                               | 0                                                                                 | 1                                      | 1                         | 1                             | 6                  |
| NAFLD                     | ANY versus NONE       | Wijarnpreec. <sup>62</sup> | 2017 | 0                        | 1                                           | 1                                          | 0                                                   | 0                                              | 1                                            | 1                                               | 0                                                                                 | 1                                      | 1                         | 1                             | 7                  |
| Neural Tube Defects       | ANY versus NONE       | Li <sup>86</sup>           | 2015 | 0                        | 1                                           | 1                                          | 0                                                   | 0                                              | 1                                            | 1                                               | 0                                                                                 | 1                                      | 1                         | 1                             | 7                  |
| Non-melanoma skin cancer  | HIGH versus LOW       | Caini <sup>42</sup>        | 2017 | 0                        | 0                                           | 1                                          | 0                                                   | 0                                              | 1                                            | 0                                               | 0                                                                                 | 1                                      | 1                         | 1                             | 5                  |
| Oesophageal Cancer        | 1 extra cup/day       | Zheng <sup>58</sup>        | 2013 | 0                        | 0                                           | 1                                          | 0                                                   | 0                                              | 1                                            | 0                                               | 0                                                                                 | 0                                      | 1                         | 1                             | 4                  |
| Oral Cancer               | HIGH versus LOW       | Wang <sup>39</sup>         | 2016 | 0                        | 1                                           | 1                                          | 0                                                   | 0                                              | 1                                            | 0                                               | 0                                                                                 | 1                                      | 0                         | 1                             | 5                  |
| Oral Cleft Malformations  | HIGH versus LOW       | Browne <sup>87</sup>       | 2006 | 0                        | 0                                           | 1                                          | 0                                                   | 0                                              | 1                                            | 0                                               | 0                                                                                 | 0                                      | 0                         | 0                             | 2                  |
| Ovarian Cancer            | 1 extra cup/day       | Braem <sup>53</sup>        | 2012 | 0                        | 0                                           | 1                                          | 0                                                   | 0                                              | 1                                            | 0                                               | 0                                                                                 | 1                                      | 1                         | 1                             | 5                  |
| Pancreatic Cancer         | 1 extra cup/day       | Ran <sup>136</sup>         | 2016 | 0                        | 0                                           | 1                                          | 0                                                   | 0                                              | 1                                            | 0                                               | 0                                                                                 | 0                                      | 1                         | 1                             | 4                  |
| Parkinson's Disease       | 1 extra cup/day       | Hernan <sup>78</sup>       | 2002 | 0                        | 1                                           | 0                                          | 0                                                   | 0                                              | 1                                            | 0                                               | 0                                                                                 | 1                                      | 1                         | 0                             | 4                  |
| Post MI Mortality         | HIGH versus LOW       | Brown <sup>30</sup>        | 2016 | 0                        | 0                                           | 1                                          | 0                                                   | 0                                              | 1                                            | 0                                               | 0                                                                                 | 1                                      | 0                         | 1                             | 4                  |
| Pregnancy Loss            | 1 extra cup/day       | Li <sup>23</sup>           | 2015 | 0                        | 1                                           | 0                                          | 0                                                   | 0                                              | 1                                            | 0                                               | 0                                                                                 | 1                                      | 1                         | 1                             | 5                  |
| Preterm-birth             | Coffee versus Control | Jahanfar <sup>88</sup>     | 2015 | 1                        | 1                                           | 1                                          | 1                                                   | 1                                              | 1                                            | 1                                               | 0                                                                                 | 1                                      | 0                         | 1                             | 1                  |
| Prostate Cancer           | 1 extra cup/day       | Wang <sup>39</sup>         | 2016 | 0                        | 1                                           | 1                                          | 0                                                   | 0                                              | 1                                            | 0                                               | 0                                                                                 | 1                                      | 0                         | 1                             | 5                  |
| Rectal Cancer             | 1 extra cup/day       | Gan <sup>20</sup>          | 2017 | 0                        | 1                                           | 1                                          | 0                                                   | 1                                              | 1                                            | 1                                               | 0                                                                                 | 1                                      | 1                         | 1                             | 8                  |
| Renal Cancer              | 1 extra cup/day       | Huang <sup>137</sup>       | 2014 | 0                        | 1                                           | 1                                          | 0                                                   | 0                                              | 1                                            | 0                                               | 0                                                                                 | 0                                      | 0                         | 1                             | 4                  |
| Renal Stones              | 1 extra cup/day       | Wang <sup>68</sup>         | 2014 | 0                        | 0                                           | 1                                          | 0                                                   | 0                                              | 1                                            | 0                                               | 0                                                                                 | 1                                      | 1                         | 1                             | 5                  |
| Rheumatoid Arthritis      | HIGH versus LOW       | Lee <sup>76,77</sup>       | 2015 | 0                        | 0                                           | 1                                          | 0                                                   | 0                                              | 1                                            | 0                                               | 0                                                                                 | 1                                      | 1                         | 1                             | 5                  |
| Small for gestational age | Coffee versus Control | Jahanfar <sup>88</sup>     | 2015 | 1                        | 1                                           | 1                                          | 1                                                   | 1                                              | 1                                            | 1                                               | 0                                                                                 | 1                                      | 0                         | 1                             | 1                  |
| Stroke                    | HIGH versus LOW       | Ding <sup>19</sup>         | 2014 | 0                        | 0                                           | 1                                          | 0                                                   | 0                                              | 1                                            | 1                                               | 1                                                                                 | 1                                      | 1                         | 1                             | 7                  |

| Outcome                 | Assessed with         | Author                | Year | A priori design provided | Duplicate study selection & data extraction | At least two electronic databases searched | Status of publication used as an inclusion criteria | List of included AND excluded studies provided | Characteristics of included studies provided | Scientific quality of included studies assessed | scientific quality of the included studies used appropriately to form conclusions | Appropriate methods to combine studies | Publication bias assessed | Conflict of interest included | Total AMSTAR Score |
|-------------------------|-----------------------|-----------------------|------|--------------------------|---------------------------------------------|--------------------------------------------|-----------------------------------------------------|------------------------------------------------|----------------------------------------------|-------------------------------------------------|-----------------------------------------------------------------------------------|----------------------------------------|---------------------------|-------------------------------|--------------------|
| Stroke Mortality        | NLDR                  | Grosso <sup>28</sup>  | 2016 | 0                        | 0                                           | 1                                          | 0                                                   | 0                                              | 1                                            | 0                                               | 0                                                                                 | 1                                      | 1                         | 1                             | 5                  |
| Systolic Blood Pressure | Coffee versus Control | Steffen <sup>35</sup> | 2012 | 0                        | 0                                           | 1                                          | 0                                                   | 0                                              | 1                                            | 1                                               | 0                                                                                 | 1                                      | 0                         | 1                             | 5                  |
| Thyroid Cancer          | HIGH versus LOW       | Han <sup>54</sup>     | 2016 | 0                        | 1                                           | 1                                          | 0                                                   | 0                                              | 1                                            | 0                                               | 0                                                                                 | 1                                      | 0                         | 1                             | 5                  |
| Total Cholesterol       | Coffee versus Control | Cai <sup>36</sup>     | 2012 | 0                        | 0                                           | 1                                          | 0                                                   | 0                                              | 1                                            | 0                                               | 0                                                                                 | 1                                      | 1                         | 1                             | 5                  |
| Triglyceride            | Coffee versus Control | Cai <sup>36</sup>     | 2012 | 0                        | 0                                           | 1                                          | 0                                                   | 0                                              | 1                                            | 0                                               | 0                                                                                 | 1                                      | 1                         | 1                             | 5                  |
| Type II diabetes        | 1 extra cup/day       | Jiang <sup>67</sup>   | 2014 | 0                        | 1                                           | 1                                          | 0                                                   | 0                                              | 1                                            | 1                                               | 1                                                                                 | 1                                      | 1                         | 1                             | 8                  |
| Urinary Incontinence    | ANY versus NONE       | Sun <sup>70</sup>     | 2016 | 0                        | 1                                           | 1                                          | 0                                                   | 0                                              | 1                                            | 0                                               | 0                                                                                 | 1                                      | 1                         | 1                             | 6                  |
| Urinary Tract Cancer    | ANY versus NONE       | Zeegers <sup>49</sup> | 2001 | 0                        | 0                                           | 1                                          | 0                                                   | 0                                              | 1                                            | 1                                               | 1                                                                                 | 1                                      | 1                         | 0                             | 6                  |
| Venous Thromboembolism  | HIGH versus LOW       | Lippi <sup>33</sup>   | 2015 | 0                        | 0                                           | 1                                          | 0                                                   | 0                                              | 1                                            | 0                                               | 0                                                                                 | 0                                      | 0                         | 1                             | 3                  |

key

|           |                |        |           |            |       |           |                 |              |                |
|-----------|----------------|--------|-----------|------------|-------|-----------|-----------------|--------------|----------------|
| Mortality | Cardiovascular | Cancer | Metabolic | Liver & GI | Renal | Pregnancy | Musculoskeletal | Neurological | Gynaecological |
|-----------|----------------|--------|-----------|------------|-------|-----------|-----------------|--------------|----------------|
