# Supplementary material for: Coffee consumption and health: umbrella review of meta-analyses of multiple health outcomes
Source: PubMed Central journal article supplement — BMJ. 2017 Nov 21;359:j5024. doi: 10.1136/bmj.j5024 (PMC5696634; doi:10.1136/bmj.j5024), 2017-11-21
Supplement: poor039281.ww4.pdf [file poor039281.ww4.pdf]

## Appendix 4: GRADE CLASSIFICATION of quality of evidence for coffee consumption and health outcomes [posted as supplied by author]

Key

|           |                |        |           |            |       |           |                 |              |                |
|-----------|----------------|--------|-----------|------------|-------|-----------|-----------------|--------------|----------------|
| Mortality | Cardiovascular | Cancer | Metabolic | Liver & GI | Renal | Pregnancy | Musculoskeletal | Neurological | Gynaecological |
|-----------|----------------|--------|-----------|------------|-------|-----------|-----------------|--------------|----------------|

### GRADE Classification of quality of evidence

| Mortality Outcome   | Assessed with   | Author               | Year | No. of studies | RCTs | Cohort | Case-control | Risk of Bias | Inconsistency              | Indirectness            | Imprecision     | Publication bias | Plausible Confounding | Magnitude of effect | Dose-response gradient | Quality          |
|---------------------|-----------------|----------------------|------|----------------|------|--------|--------------|--------------|----------------------------|-------------------------|-----------------|------------------|-----------------------|---------------------|------------------------|------------------|
| All-cause Mortality | NLDR            | Grosso <sup>28</sup> | 2016 | 24             | 0    | 24     | 0            | Serious Risk | Very Serious Inconsistency | No Serious Indirectness | No Serious Risk | Undetected(j)    | Would reduce effect   | No                  | Yes                    | ⊕○○○<br>VERY LOW |
| Cancer Mortality    | NLDR            | Grosso <sup>28</sup> | 2016 | 15             | 0    | 15     | 0            | Serious Risk | Very Serious Inconsistency | No Serious Indirectness | Serious Risk    | Undetected(j)    | Would reduce effect   | No                  | Yes                    | ⊕○○○<br>VERY LOW |
| CHD Mortality       | NLDR            | Grosso <sup>28</sup> | 2016 | 12             | 0    | 12     | 0            | Serious Risk | Very Serious Inconsistency | No Serious Indirectness | No Serious Risk | Undetected(j)    | Would reduce effect   | No                  | Yes                    | ⊕○○○<br>VERY LOW |
| CVD Mortality       | NLDR            | Grosso <sup>28</sup> | 2016 | 23             | 0    | 23     | 0            | Serious Risk | Very Serious Inconsistency | No Serious Indirectness | No Serious Risk | Undetected(j)    | Would reduce effect   | No                  | Yes                    | ⊕○○○<br>VERY LOW |
| Cirrhosis Mortality | 1 extra cup/day | Kennedy <sup>9</sup> | 2016 | 4              | 0    | 4      | 0            | Serious Risk | Serious Inconsistency      | No Serious Indirectness | No Serious Risk | Undetected(g)    | Would reduce effect   | No                  | Yes                    | ⊕⊕○○<br>LOW      |
| Stroke Mortality    | NLDR            | Grosso <sup>28</sup> | 2016 | 9              | 0    | 9      | 0            | Serious Risk | Very Serious Inconsistency | No Serious Indirectness | No Serious Risk | Undetected(j)    | Would reduce effect   | No                  | Yes                    | ⊕○○○<br>VERY LOW |
| Post MI-mortality   | HIGH versus LOW | Brown <sup>30</sup>  | 2016 | 2              | 0    | 2      | 0            | Serious Risk | No Serious Inconsistency   | No Serious Indirectness | No Serious Risk | (h)              | Would reduced effect  | No                  | No                     | ⊕○○○<br>VERY LOW |

| Cardiovascular Outcome | Assessed with   | Author                | Year | No. of studies | RCTs | Cohort | Case-control | Risk of Bias | Inconsistency         | Indirectness            | Imprecision  | Publication bias | Plausible Confounding   | Magnitude of effect | Dose-response gradient | Quality          |
|------------------------|-----------------|-----------------------|------|----------------|------|--------|--------------|--------------|-----------------------|-------------------------|--------------|------------------|-------------------------|---------------------|------------------------|------------------|
| Atrial Fibrillation    | 1 extra cup/day | Larsson <sup>32</sup> | 2015 | 6              | 0    | 6      | 0            | Serious Risk | Serious Inconsistency | No Serious Indirectness | Serious Risk | Undetected       | Would not reduce effect | No                  | No                     | ⊕○○○<br>VERY LOW |
| Cardiovascular Disease | HIGH versus LOW | Ding <sup>19</sup>    | 2014 | 35             | 0    | 35     | 0            | Serious Risk | Serious Inconsistency | No Serious Indirectness | Serious Risk | Undetected       | Would not reduce effect | No                  | No                     | ⊕○○○<br>VERY LOW |
| Coronary Heart Disease | HIGH versus LOW | Ding <sup>19</sup>    | 2014 | 23             | 0    | 23     | 0            | Serious Risk | Serious Inconsistency | No Serious Indirectness | Serious Risk | Undetected       | Would not reduce effect | No                  | No                     | ⊕○○○<br>VERY LOW |

| Cardiovascular Outcome   | Assessed with         | Author                  | Year | No. of studies | RCTs | Cohort | Case-control | Risk of Bias | Inconsistency            | Indirectness            | Imprecision     | Publication bias   | Plausible Confounding   | Magnitude of effect | Dose-response gradient | Quality          |
|--------------------------|-----------------------|-------------------------|------|----------------|------|--------|--------------|--------------|--------------------------|-------------------------|-----------------|--------------------|-------------------------|---------------------|------------------------|------------------|
| Diastolic Blood Pressure | Coffee versus Control | Steffen <sup>35</sup>   | 2012 | 12             | 12   | 0      | 0            | Serious Risk | No Serious Inconsistency | No Serious Indirectness | Serious Risk    | (h)                | Would not reduce effect | No                  | No                     | ⊕⊕○○<br>LOW      |
| HDL-Cholesterol          | Coffee versus Control | Cai <sup>36</sup>       | 2012 | 9              | 9    | 0      | 0            | Serious Risk | No Serious Inconsistency | No Serious Indirectness | Serious Risk    | Undetected         | Would not reduce effect | No                  | No                     | ⊕⊕○○<br>LOW      |
| Heart Failure            | HIGH versus LOW       | Mostofsky <sup>24</sup> | 2012 | 5              | 0    | 5      | 0            | Serious Risk | No Serious Inconsistency | No Serious Indirectness | Serious Risk    | Undetected         | Would not reduce effect | No                  | No                     | ⊕○○○<br>VERY LOW |
| Hypertension             | HIGH versus LOW       | Zhang <sup>34</sup>     | 2011 | 6              | 0    | 6      | 0            | Serious Risk | No Serious Inconsistency | No Serious Indirectness | Serious Risk    | Undetected         | Would not reduce effect | No                  | No                     | ⊕○○○<br>VERY LOW |
| LDL-Cholesterol          | Coffee versus Control | Cai <sup>36</sup>       | 2012 | 7              | 7    | 0      | 0            | Serious Risk | Serious Inconsistency    | No Serious Indirectness | No Serious Risk | Undetected         | Would not reduce effect | No                  | No                     | ⊕⊕○○<br>LOW      |
| Stroke                   | HIGH versus LOW       | Ding <sup>19</sup>      | 2014 | 15             | 0    | 15     | 0            | Serious Risk | Serious Inconsistency    | No Serious Indirectness | Serious Risk    | Undetected         | Would not reduce effect | No                  | No                     | ⊕○○○<br>VERY LOW |
| Systolic Blood Pressure  | Coffee versus Control | Steffen <sup>35</sup>   | 2012 | 12             | 12   | 0      | 0            | Serious Risk | Serious Inconsistency    | No Serious Indirectness | Serious Risk    | (h)                | Would not reduce effect | No                  | No                     | ⊕⊕○○<br>LOW      |
| Total Cholesterol        | Coffee versus Control | Cai <sup>36</sup>       | 2012 | 12             | 12   | 0      | 0            | Serious Risk | Serious Inconsistency    | No Serious Indirectness | No Serious Risk | Strongly Suspected | Would not reduce effect | No                  | No                     | ⊕⊕○○<br>LOW      |
| Triglyceride             | Coffee versus Control | Cai <sup>36</sup>       | 2012 | 6              | 6    | 0      | 0            | Serious Risk | Serious Inconsistency    | No Serious Indirectness | No Serious Risk | Undetected         | Would not reduce effect | No                  | No                     | ⊕⊕○○<br>LOW      |
| Venous Thromboembolism   | HIGH versus LOW       | Lippi <sup>33</sup>     | 2015 | 2              | 0    | 2      | 0            | Serious Risk | Serious Inconsistency    | No Serious Indirectness | Serious Risk    | (h)                | Would not reduce effect | No                  | No                     | ⊕○○○<br>VERY LOW |

| Cancer Outcome | Assessed with   | Author            | Year | No. of studies | RCTs | Cohort | Case-control | Risk of Bias | Inconsistency              | Indirectness            | Imprecision     | Publication bias | Plausible Confounding   | Magnitude of effect | Dose-response gradient | Quality          |
|----------------|-----------------|-------------------|------|----------------|------|--------|--------------|--------------|----------------------------|-------------------------|-----------------|------------------|-------------------------|---------------------|------------------------|------------------|
| All Cancer     | 1 extra cup/day | Yu <sup>38</sup>  | 2011 | 40             | 0    | 40     | 0            | Serious Risk | Very Serious Inconsistency | No Serious Indirectness | No Serious Risk | Undetected(g)    | Would reduce effect     | No                  | Yes                    | ⊕○○○<br>VERY LOW |
| Bladder Cancer | 1 extra cup/day | Wu <sup>135</sup> | 2015 | 6              | 0    | 6      | 0            | Serious Risk | No Serious Inconsistency   | No Serious Indirectness | Serious Risk    | Undetected(g)    | Would not reduce effect | No                  | No                     | ⊕○○○<br>VERY LOW |
| Breast Cancer  | 1 extra cup/day | Li <sup>56</sup>  | 2013 | 15             | 0    | 15     | 0            | Serious Risk | No Serious Inconsistency   | No Serious Indirectness | No Serious Risk | Undetected(g)    | Would not reduce effect | No                  | Yes                    | ⊕⊕○○<br>LOW      |
| Colon Cancer   | 1 extra cup/day | Gan <sup>20</sup> | 2017 | 15             | 0    | 15     | 0            | Serious Risk | No Serious Inconsistency   | No Serious Indirectness | No Serious Risk | Undetected       | Would reduce effect     | No                  | Yes                    | ⊕○○○<br>VERY LOW |

| Cancer Outcome           | Assessed with   | Author                  | Year | No. of studies | RCTs | Cohort | Case-control | Risk of Bias      | Inconsistency                 | Indirectness            | Imprecision     | Publication bias | Plausible Confounding   | Magnitude of effect | Dose-response gradient | Quality          |
|--------------------------|-----------------|-------------------------|------|----------------|------|--------|--------------|-------------------|-------------------------------|-------------------------|-----------------|------------------|-------------------------|---------------------|------------------------|------------------|
| Colorectal Cancer        | 1 extra cup/day | Gan <sup>20</sup>       | 2017 | 17             | 0    | 17     | 0            | Serious Risk      | Serious Inconsistency         | No Serious Indirectness | Serious Risk    | Undetected       | Would reduce effect     | No                  | No                     | ⊕○○○<br>VERY LOW |
| Endometrial Cancer       | 1 extra cup/day | Wang <sup>39</sup>      | 2016 | 11             | 0    | 11     | 0            | Serious Risk      | Very Serious Inconsistency(h) | No Serious Indirectness | No Serious Risk | (h)              | Would reduce effect     | No                  | Yes                    | ⊕○○○<br>VERY LOW |
| Gastric Cancer           | 1 extra cup/day | Zeng <sup>51</sup>      | 2015 | 9              | 0    | 9      | 0            | Serious Risk      | Serious Inconsistency         | No Serious Indirectness | Serious Risk    | Undetected       | Would not reduce effect | No                  | No                     | ⊕○○○<br>VERY LOW |
| Glioma                   | 1 extra cup/day | Malerba <sup>61</sup>   | 2012 | 3              | 0    | 3      | 0            | Serious Risk      | Serious Inconsistency         | No Serious Indirectness | Serious Risk    | Undetected       | Would not reduce effect | No                  | No                     | ⊕○○○<br>VERY LOW |
| Laryngeal Cancer         | HIGH versus LOW | Ouyang <sup>59</sup>    | 2014 | 8              | 0    | 1      | 7            | Serious Risk      | Serious Inconsistency         | No Serious Indirectness | Serious Risk    | Undetected       | Would not reduce effect | No                  | No                     | ⊕○○○<br>VERY LOW |
| Leukaemia                | HIGH versus LOW | Yu <sup>38</sup>        | 2011 | 2              | 0    | 2      | 0            | Serious Risk      | No Serious Inconsistency      | No Serious Indirectness | No Serious Risk | Undetected(g)    | Would not reduce effect | No                  | No                     | ⊕○○○<br>VERY LOW |
| Liver Cancer             | 1 extra cup/day | Bravi <sup>43</sup>     | 2016 | 12             | 0    | 12     | 0            | Serious Risk      | No Serious Inconsistency(g)   | No Serious Indirectness | No Serious Risk | Undetected       | Would reduce effect     | Large(k)            | Yes                    | ⊕⊕○○<br>LOW      |
| Lymphoma                 | HIGH versus LOW | Wang <sup>39</sup>      | 2016 | 3              | 0    | 3      | 0            | Serious Risk      | No Serious Inconsistency      | No Serious Indirectness | Serious Risk    | Undetected(j)    | Would not reduce effect | No                  | No                     | ⊕○○○<br>VERY LOW |
| Lung Cancer              | 1 extra cup/day | Galarraga <sup>47</sup> | 2016 | 21             | 0    | 8      | 13           | Very Serious Risk | Serious Inconsistency         | No Serious Indirectness | No Serious Risk | Detected         | Would not reduce effect | No                  | Yes                    | ⊕○○○<br>VERY LOW |
| Melanoma                 | 1 extra cup/day | Wang <sup>45</sup>      | 2015 | 7              | 0    | 6      | 1            | Serious Risk      | Serious Inconsistency         | No Serious Indirectness | No Serious Risk | Undetected(g)    | Would reduce effect     | No                  | Yes                    | ⊕○○○<br>VERY LOW |
| Non-melanoma skin cancer | HIGH versus LOW | Cain <sup>42</sup>      | 2017 | 4              | 0    | 4      | 0            | Serious Risk      | Serious Inconsistency         | No Serious Indirectness | No Serious Risk | (h)              | Would reduce effect     | No                  | No                     | ⊕○○○<br>VERY LOW |
| Oesophageal Cancer       | 1 extra cup/day | Zheng <sup>58</sup>     | 2013 | NP             | 0    | NP     | NP           | Serious Risk      | No serious Inconsistency(g)   | No Serious Indirectness | Serious Risk    | Undetected(g)    | Would not reduce effect | No                  | No                     | ⊕○○○<br>VERY LOW |
| Oral Cancer              | HIGH versus LOW | Wang <sup>39</sup>      | 2016 | 6              | 0    | 6      | 0            | Serious Risk      | Serious Inconsistency         | No Serious Indirectness | No Serious Risk | Undetected(i)    | Would reduce effect     | No                  | No                     | ⊕○○○<br>VERY LOW |
| Ovarian Cancer           | 1 extra cup/day | Braem <sup>53</sup>     | 2012 | 6              | 0    | 6      | 0            | Serious Risk      | Serious Inconsistency(g)      | No Serious Indirectness | Serious Risk    | Undetected(g)    | Would not reduce effect | No                  | No                     | ⊕○○○<br>VERY LOW |
| Pancreatic Cancer        | 1 extra cup/day | Ran <sup>136</sup>      | 2016 | 9              | 0    | 9      | 0            | Serious Risk      | No Serious Inconsistency(g)   | No Serious Indirectness | Serious Risk    | Undetected(g)    | Would not reduce effect | No                  | No                     | ⊕○○○<br>VERY LOW |
| Prostate Cancer          | 1 extra cup/day | Wang <sup>39</sup>      | 2016 | 10             | 0    | 10     | 0            | Serious Risk      | No Serious Inconsistency(g)   | No Serious Indirectness | No Serious Risk | Undetected(g)    | Would reduce effect     | No                  | Yes                    | ⊕⊕○○<br>LOW      |

| Cancer Outcome       | Assessed with   | Author                | Year | No. of studies | RCTs | Cohort | Case-control | Risk of Bias      | Inconsistency               | Indirectness            | Imprecision     | Publication bias | Plausible Confounding   | Magnitude of effect | Dose-response gradient | Quality          |
|----------------------|-----------------|-----------------------|------|----------------|------|--------|--------------|-------------------|-----------------------------|-------------------------|-----------------|------------------|-------------------------|---------------------|------------------------|------------------|
| Rectal Cancer        | 1 extra cup/day | Gan <sup>20</sup>     | 2017 | 14             | 0    | 14     | 0            | Serious Risk      | No Serious Inconsistency    | No Serious Indirectness | Serious Risk    | Undetected       | Would not reduce effect | No                  | No                     | ⊕○○○<br>VERY LOW |
| Renal Cancer         | 1 extra cup/day | Huang <sup>137</sup>  | 2014 | 4              | 0    | 4      | 0            | Serious Risk      | No Serious Inconsistency(g) | No Serious Indirectness | Serious Risk    | (h)              | Would not reduce effect | No                  | No                     | ⊕○○○<br>VERY LOW |
| Thyroid Cancer       | HIGH versus LOW | Han <sup>54</sup>     | 2017 | 2              | 0    | 2      | 0            | Serious Risk      | No Serious Inconsistency    | No Serious Indirectness | Serious Risk    | (h)              | Would reduce effect     | No                  | No                     | ⊕○○○<br>VERY LOW |
| Urinary Tract Cancer | ANY versus NONE | Zeegers <sup>49</sup> | 2001 | 14             | 0    | 0      | 14           | Very Serious Risk | ^Very Serious Inconsistency | No Serious Indirectness | No Serious Risk | Undetected       | Would not reduce effect | No                  | No                     | ⊕○○○<br>VERY LOW |

| Pregnancy Outcome                       | Assessed with         | Author                    | Year | No. of studies | RCTs | Cohort | Case-control | Risk of Bias      | Inconsistency                 | Indirectness            | Imprecision     | Publication bias | Plausible Confounding   | Magnitude of effect | Dose-response gradient | Quality          |
|-----------------------------------------|-----------------------|---------------------------|------|----------------|------|--------|--------------|-------------------|-------------------------------|-------------------------|-----------------|------------------|-------------------------|---------------------|------------------------|------------------|
| 1 <sup>st</sup> Trimester Preterm Birth | HIGH versus LOW       | Maslova <sup>85</sup>     | 2010 | NP             | 0    | NP     | NP           | Serious Risk      | Very Serious Inconsistency(h) | No Serious Indirectness | No Serious Risk | Undetected(g)    | Would not reduce effect | No                  | No                     | ⊕○○○<br>VERY LOW |
| 2 <sup>nd</sup> Trimester Preterm Birth | HIGH versus LOW       | Maslova <sup>85</sup>     | 2010 | NP             | 0    | NP     | NP           | Serious Risk      | Very Serious Inconsistency(h) | No Serious Indirectness | No Serious Risk | Undetected(g)    | Would not reduce effect | No                  | No                     | ⊕○○○<br>VERY LOW |
| 3 <sup>rd</sup> Trimester Preterm Birth | HIGH versus LOW       | Maslova <sup>85</sup>     | 2010 | NP             | 0    | NP     | NP           | Serious Risk      | Very Serious Inconsistency(h) | No Serious Indirectness | Serious Risk    | Undetected(g)    | Would not reduce effect | No                  | No                     | ⊕○○○<br>VERY LOW |
| Acute Leukaemia of Childhood            | HIGH versus LOW       | Thomopoulos <sup>89</sup> | 2015 | 6              | 0    | 0      | 6            | Very Serious Risk | Serious Inconsistency         | No Serious Indirectness | No Serious Risk | (h)              | Would not reduce effect | No                  | No                     | ⊕○○○<br>VERY LOW |
| Birth weight                            | Coffee versus Control | Jahanfar <sup>88</sup>    | 2015 | 1              | 1    | 0      | 0            | Serious Risk      | N/A                           | No Serious Indirectness | Serious Risk    | N/A              | Would not reduce effect | No                  | No                     | ⊕⊕○○<br>LOW      |
| Cardiovascular Malformations            | HIGH versus LOW       | Browne <sup>87</sup>      | 2006 | 4              | 0    | 1      | 3            | Serious Risk      | Serious Inconsistency         | No Serious Indirectness | Serious Risk    | (h)              | Would not reduce effect | No                  | No                     | ⊕○○○<br>VERY LOW |
| Low Birth Weight                        | 1 extra cup/day       | Chen <sup>134</sup>       | 2014 | 2              | 0    | 1      | 1            | Serious Risk      | Very Serious Inconsistency    | No Serious Indirectness | No Serious Risk | Undetected(g)    | Would not reduce effect | No                  | Yes                    | ⊕○○○<br>VERY LOW |
| Neural Tube Defects                     | ANY versus NONE       | Li <sup>86</sup>          | 2015 | 7              | 0    | 1      | 6            | Serious Risk      | Serious Inconsistency         | No Serious Indirectness | Serious Risk    | Undetected       | Would not reduce effect | No                  | No                     | ⊕○○○<br>VERY LOW |
| Oral Cleft Malformations                | HIGH versus LOW       | Browne <sup>87</sup>      | 2006 | 3              | 0    | 1      | 2            | Serious Risk      | No Serious Inconsistency      | No Serious Indirectness | Serious Risk    | (h)              | Would not reduce effect | No                  | No                     | ⊕○○○<br>VERY LOW |
| Pregnancy Loss                          | 1 extra cup/day       | Li <sup>23</sup>          | 2015 | 6              | 0    | 4      | 2            | Serious Risk      | *Serious Inconsistency        | No Serious Indirectness | No Serious Risk | Undetected(g)    | Would not reduce effect | No                  | Yes                    | ⊕○○○<br>VERY LOW |

| Pregnancy Outcome         | Assessed with         | Author                 | Year | No. of studies | RCTs | Cohort | Case-control | Risk of Bias | Inconsistency | Indirectness            | Imprecision  | Publication bias | Plausible Confounding   | Magnitude of effect | Dose-response gradient | Quality     |
|---------------------------|-----------------------|------------------------|------|----------------|------|--------|--------------|--------------|---------------|-------------------------|--------------|------------------|-------------------------|---------------------|------------------------|-------------|
| Preterm birth             | Coffee versus Control | Jahanfar <sup>88</sup> | 2015 | 1              | 1    | 0      | 0            | Serious Risk | N/A           | No Serious Indirectness | Serious Risk | N/A              | Would not reduce effect | No                  | No                     | ⊕⊕○○<br>LOW |
| Small for gestational age | Coffee versus Control | Jahanfar <sup>88</sup> | 2015 | 1              | 1    | 0      | 0            | Serious Risk | N/A           | No Serious Indirectness | Serious Risk | N/A              | Would not reduce effect | No                  | No                     | ⊕⊕○○<br>LOW |

| Metabolic & Gastrointestinal Outcome | Assessed with   | Author                      | Year | No. of studies | RCTs | Cohort | Case-control | Risk of Bias      | Inconsistency               | Indirectness            | Imprecision     | Publication bias      | Plausible Confounding   | Magnitude of effect | Dose-response gradient | Quality          |
|--------------------------------------|-----------------|-----------------------------|------|----------------|------|--------|--------------|-------------------|-----------------------------|-------------------------|-----------------|-----------------------|-------------------------|---------------------|------------------------|------------------|
| Chronic Liver Disease                | 1 extra cup/day | Bravi <sup>43</sup>         | 2016 | 6              | 0    | 6      | 0            | Serious Risk      | Serious Inconsistency       | No Serious Indirectness | No Serious Risk | Undetected(g)         | Would reduce effect     | Yes                 | Yes                    | ⊕⊕○○<br>LOW      |
| Cirrhosis                            | 1 extra cup/day | Kennedy <sup>9</sup>        | 2016 | 7              | 0    | 7      | 0            | Serious Risk      | Serious Inconsistency       | No Serious Indirectness | No Serious Risk | Undetected(g)         | Would reduce effect     | No                  | Yes                    | ⊕⊕○○<br>LOW      |
| Gallstones                           | 1 extra cup/day | Zhang <sup>25</sup>         | 2015 | 3              | 0    | 3      | 0            | Serious Risk      | Serious Inconsistency       | No Serious Indirectness | No Serious Risk | Undetected(g)         | Would not reduce effect | No                  | Yes                    | ⊕○○○<br>VERY LOW |
| Gastrointestinal Reflux Disease      | HIGH versus LOW | Kim <sup>66</sup>           | 2013 | 15             | 0    | 0      | 15           | Very Serious Risk | Serious Inconsistency       | No Serious Indirectness | Serious Risk    | Undetected            | Would not reduce effect | No                  | No                     | ⊕○○○<br>VERY LOW |
| Gout                                 | HIGH versus LOW | Park <sup>69</sup>          | 2016 | 2              | 0    | 2      | 0            | Serious Risk      | No Serious Inconsistency    | No Serious Indirectness | No Serious Risk | (h)                   | Would not reduce effect | No                  | No                     | ⊕○○○<br>VERY LOW |
| Liver Fibrosis                       | ANY versus NONE | Liu <sup>63</sup>           | 2015 | 8              | 0    | 7      | 1            | Serious Risk      | Serious Inconsistency       | No Serious Indirectness | No Serious Risk | (h)                   | Would reduce effect     | No                  | No                     | ⊕○○○<br>VERY LOW |
| Metabolic Syndrome                   | HIGH versus LOW | Shang <sup>26</sup>         | 2015 | 4              | 0    | 4      | 0            | Serious Risk      | No Serious Inconsistency    | No Serious Indirectness | No Serious Risk | Strongly suspected(g) | Would not reduce effect | No                  | No                     | ⊕○○○<br>VERY LOW |
| NAFLD                                | ANY versus NONE | Wijarnpreecha <sup>62</sup> | 2017 | 3              | 0    | 1      | 1            | Very Serious Risk | No Serious Inconsistency    | No Serious Indirectness | No Serious Risk | (h)                   | Would reduce effect     | No                  | No                     | ⊕○○○<br>VERY LOW |
| Renal Stones                         | 1 extra cup/day | Wang <sup>68</sup>          | 2014 | 5              | 0    | 3      | 2            | Serious Risk      | No Serious Inconsistency    | No Serious Indirectness | No Serious Risk | Undetected            | Would not reduce effect | No                  | Yes                    | ⊕⊕○○<br>LOW      |
| Type II diabetes                     | 1 extra cup/day | Jiang <sup>67</sup>         | 2014 | 20             | 0    | 20     | 0            | Serious Risk      | No Serious Inconsistency(g) | No Serious Indirectness | No Serious Risk | Undetected(g)         | Would not reduce effect | No                  | Yes                    | ⊕⊕○○<br>LOW      |

| Renal Outcome           | Assessed with   | Author                      | Year | No. of studies | RCTs | Cohort | Case-control | Risk of Bias      | Inconsistency                 | Indirectness            | Imprecision     | Publication bias      | Plausible Confounding   | Magnitude of effect | Dose-response gradient | Quality          |
|-------------------------|-----------------|-----------------------------|------|----------------|------|--------|--------------|-------------------|-------------------------------|-------------------------|-----------------|-----------------------|-------------------------|---------------------|------------------------|------------------|
| CKD                     | ANY versus NONE | Wijarnpreecha <sup>71</sup> | 2016 | 4(e)           | 0    | 0      | 0            | Very Serious Risk | Serious Inconsistency         | No Serious Indirectness | Serious Risk    | (h)                   | Would reduce effect     | No                  | No                     | ⊕○○○<br>VERY LOW |
| Urinary Incontinence    | ANY versus NONE | Sun <sup>70</sup>           | 2016 | 3(e)           | 0    | 1      | 0            | Very Serious Risk | Very Serious Inconsistency    | No Serious Indirectness | Serious Risk    | (h)                   | Would reduce effect     | No                  | No                     | ⊕○○○<br>VERY LOW |
| Musculoskeletal Outcome | Assessed with   | Author                      | Year | No. of studies | RCTs | Cohort | Case-control | Risk of Bias      | Inconsistency                 | Indirectness            | Imprecision     | Publication bias      | Plausible Confounding   | Magnitude of effect | Dose-response gradient | Quality          |
| Fracture                | 1 extra cup/day | Liu <sup>73</sup>           | 2012 | 10             | 0    | 10     | 0            | Serious Risk      | Serious Inconsistency         | No Serious Indirectness | Serious Risk    | Strongly Suspected(g) | Would not reduce effect | No                  | No                     | ⊕○○○<br>VERY LOW |
| Hip Fracture            | 1 extra cup/day | Li <sup>75</sup>            | 2013 | 4              | 0    | 4      | 0            | Serious Risk      | Serious Inconsistency(g)      | No Serious Indirectness | Serious Risk    | Undetected(g)         | Would not reduce effect | No                  | No                     | ⊕○○○<br>VERY LOW |
| Rheumatoid Arthritis    | HIGH versus LOW | Lee <sup>76,77</sup>        | 2015 | 3              | 0    | 3      | 0            | Serious Risk      | No Serious Inconsistency      | No Serious Indirectness | Serious Risk    | Undetected(g)         | Would not reduce effect | No                  | No                     | ⊕○○○<br>VERY LOW |
| Neurological Outcome    | Assessed with   | Author                      | Year | No. of studies | RCTs | Cohort | Case-control | Risk of Bias      | Inconsistency                 | Indirectness            | Imprecision     | Publication bias      | Plausible Confounding   | Magnitude of effect | Dose-response gradient | Quality          |
| Alzheimer's Disease     | 1 extra cup/day | Liu <sup>82</sup>           | 2016 | 2              | 0    | 2      | 0            | Serious Risk      | No Serious Inconsistency      | No Serious Indirectness | Serious Risk    | (h)                   | Would not reduce effect | No                  | No                     | ⊕○○○<br>VERY LOW |
| Cognitive Decline       | 1 extra cup/day | Liu <sup>82</sup>           | 2016 | 8              | 0    | 8      | 0            | Serious Risk      | No Serious Inconsistency      | No Serious Indirectness | Serious Risk    | Undetected            | Would not reduce effect | No                  | No                     | ⊕○○○<br>VERY LOW |
| Depression              | 1 extra cup/day | Wang <sup>81</sup>          | 2016 | 5(e)           | 0    | 2      | 1            | Very Serious Risk | Serious Inconsistency         | No Serious Indirectness | No Serious Risk | Strongly Suspected    | Would not reduce effect | No                  | Yes                    | ⊕○○○<br>VERY LOW |
| Parkinson's Disease     | 1 extra cup/day | Hernan <sup>78</sup>        | 2002 | 4              | 0    | 4      | 0            | Serious Risk      | Very Serious Inconsistency(g) | No Serious Indirectness | No Serious Risk | Undetected(j)         | Would not reduce effect | No                  | Yes                    | ⊕○○○<br>VERY LOW |
| Gynaecological Outcome  | Assessed with   | Author                      | Year | No. of studies | RCTs | Cohort | Case-control | Risk of Bias      | Inconsistency                 | Indirectness            | Imprecision     | Publication bias      | Plausible Confounding   | Magnitude of effect | Dose-response gradient | Quality          |
| Endometriosis           | ANY versus NONE | Chiaffarino <sup>83</sup>   | 2014 | 3              | 0    | 1      | 2            | Serious Risk      | Serious Inconsistency         | No Serious Indirectness | Serious Risk    | Undetected            | Would not reduce effect | No                  | No                     | ⊕○○○<br>VERY LOW |

(e) Included cross-sectional studies

- (g) Based on heterogeneity/publication bias of overall study
- (h) No heterogeneity/publication bias published
- (i) Based on alternative measure of heterogeneity
- (j) Stated as undetected
- (k) Based on HIGH versus LOW comparisons
